36 **Mutation and recombination are key evolutionary processes governing phenotypic**  
37 **variation and reproductive isolation. We here demonstrate that biodiversity within all**  
38 **globally known strains of *Schizosaccharomyces pombe* arose through admixture between**  
39 **two divergent ancestral lineages. Initial hybridization occurred ~20 sexual outcrossing**  
40 **generations ago consistent with recent, human-induced migration at the onset of**  
41 **intensified transcontinental trade. Species-wide heritable phenotypic variation was**  
42 **explained near-exclusively by strain-specific arrangements of alternating ancestry**  
43 **components with evidence for transgressive segregation. Reproductive compatibility**  
44 **between strains was likewise predicted by the degree of shared ancestry. To assess the**  
45 **genetic determinants of ancestry block distribution across the genome, we characterized**  
46 **the type, frequency and position of structural genomic variation (SV) using nanopore**  
47 **and single-molecule real time sequencing, discovering over 800 SVs. Despite being**  
48 **associated with double-strand break initiation points, SV exerted overall little influence**  
49 **on the introgression landscape or on reproductive compatibility that exist between**  
50 **strains. In contrast, we find strongly increased statistical linkage between ancestral**  
51 **populations that is consistent with negative epistatic selection shaping genomic ancestry**  
52 **combinations during the course of hybridization. This study provides a detailed,**  
53 **experimentally tractable example that genomes of natural populations are mosaics**  
54 **reflecting different evolutionary histories. Exploiting genome-wide heterogeneity in the**  
55 **history of ancestral recombination and lineage-specific mutations sheds new light on the**  
56 **population history of *S. pombe* and highlights the importance of hybridization as a**  
57 **creative force in generating biodiversity.**

58

59

60

## 61 **Introduction**

62 Mutation is the ultimate source of biodiversity. In sexually reproducing organisms it is  
63 assisted by recombination shuffling mutations of independent genomic backgrounds into  
64 millions of novel combinations. This widens the phenotypic space upon which selection can  
65 act and thereby accelerates evolutionary change (Muller, 1932; Fisher, 1999; McDonald et al.,  
66 2016). This effect is enhanced for heterospecific recombination between genomes of  
67 divergent populations (Abbott et al., 2013). Novel combinations of independently  
68 accumulated mutations can significantly increase the overall genetic and phenotypic variation,  
69 even beyond the phenotypic space of parental lineages (transgressive segregation  
70 (Lamichhaney et al., 2017; Nolte and Sheets, 2005)). Yet, if mutations of the parental  
71 genomes are not compatible to produce viable and fertile offspring, hybridization is a dead  
72 end. Phenotypic variation then remains within the confines of genetic variation of each  
73 reproductively isolated, parental lineage.

74  
75 It is increasingly recognised that hybridization is commonplace in nature, and constitutes an  
76 important driver of diversification (Abbott et al., 2013; Mallet, 2005). Ancestry components  
77 of hybrid genomes can range from clear dominance of alleles from the more abundant species  
78 (Dowling et al., 1989; Taylor and Hebert, 1993), over a range of admixture proportions  
79 (Lamichhaney et al., 2017; Runemark et al., 2018) to the transfer of single adaptive loci (The  
80 Heliconius Genome Consortium et al., 2012). The final genomic composition is determined  
81 by a complex interplay of demographic processes, heterogeneity in recombination (e.g.  
82 induced by genomic rearrangements) (Wellenreuther and Bernatchez, 2018) and selection  
83 (Sankararaman et al., 2014; Schumer et al., 2016). Progress in sequencing technology, now  
84 allows characterisation of patterns of admixture and the illumination of underlying processes  
85 (Payseur and Rieseberg, 2016). Yet, research has largely focused on animals (Turner and Harr,

86 2014; Vijay et al., 2016; Meier et al., 2017; Jay et al., 2018) and plants (Twyford et al., 2015)  
87 characterized by large genomes and long generation times. Relatively little attention has been  
88 paid to natural populations of sexually reproducing micro-organisms (Leducq et al., 2016;  
89 Stukenbrock, 2016; Peter et al., 2018; Steenkamp et al., 2018).

90

91 The fission yeast *Schizosaccharomyces pombe* is an archiascomycete haploid unicellular  
92 fungus with a facultative sexual mode of reproduction. Despite of its outstanding importance  
93 as a model system in cellular biology (Hoffman et al., 2015) and the existence of global  
94 sample collections, essentially all research has been limited to a single isogenic strain isolated  
95 by Leupold in 1949 (Leupold 972; JB22 in this study). Very little is known about the ecology,  
96 origin, and evolutionary history of the species (Jeffares, 2018). Global population structure  
97 has been described shallow with no apparent geographic stratification (Jeffares et al., 2015).  
98 Genetic diversity ( $\pi = 3 \times 10^{-3}$  substitutions/site) appears to be strongly influenced by genome-  
99 wide purifying selection with the possible exception of region-specific balancing selection  
100 (Fawcett et al., 2014; Jeffares et al., 2015). Despite the overall low genetic diversity, *S. pombe*  
101 shows abundant additive genetic variation in a variety of phenotypic traits including growth,  
102 stress responses, cell morphology, and cellular biochemistry (Jeffares et al., 2015). The  
103 apparent worldwide lack of genetic structure in this species appears inconsistent with the large  
104 phenotypic variation between strains and with evidence for post-zygotic reproductive  
105 isolation between inter-strain crosses, ranging from 1% to 90 % of spore viability  
106 (Kondrat'eva and Naumov, 2001; Teresa Avelar et al., 2013; Zanders et al., 2014; Jeffares et  
107 al., 2015; Naumov et al., 2015; Marsellach, 2017).

108

109 In this study, we integrate whole-genome sequencing data from three different technologies -  
110 sequencing-by-synthesis (Illumina technology data accessed from (Jeffares et al., 2015)),

111 single-molecule real-time sequencing (Pacific BioSciences technology, this study) and  
112 nanopore sequencing (Oxford Nanopore technology, this study) - sourced from a mostly  
113 human-associated, global sample collection to elucidate the evolutionary history of the *S.*  
114 *pombe* complex. Using population genetic analyses based on single nucleotide polymorphism  
115 (SNP) we show that global genetic variation and heritable phenotype variation of *S. pombe*  
116 results from recent hybridization of two ancient lineages. 25 *de novo* assemblies from 17  
117 divergent strains further allowed us to quantify segregating structural variation including  
118 insertions, deletions, inversion and translocations. In light of these findings, we retrace the  
119 global population history of the species, and discuss the relative importance of genome-wide  
120 ancestry and structural mutations in explaining phenotypic variation and reproductive  
121 isolation.

122

## 123 **Results**

124

### 125 **Global genetic variation in *S. pombe* is characterized by ancient admixture**

126 Genetic variation of the global *S. pombe* collection comprises 172,935 SNPs segregating in  
127 161 strains. Considering SNPs independently, individuals can be sub-structured into 57 clades  
128 that differ by more than 1900 variants, but are near-clonal within clades (Jeffares et al., 2015).  
129 To examine population ancestry further, we divided the genome into 1925 overlapping  
130 windows containing 200 SNP each and one representative from each clade (57 samples in  
131 total). Principle component analysis conducted on each orthologous window showed a highly  
132 consistent pattern along the genome (**Figure 1a, Supplementary Figure 1**): i) the major axis  
133 of variation (PC1) split all samples into two clear discrete groups explaining  $60\% \pm 13\%$  of  
134 genetic variance (**Figure 1b**). ii) All samples fell into either extreme of the normalized  
135 distribution of PC1 scores ( $PC1 \in [0; 0.3] \cup [0.7; 1]$ ) (**Supplementary Figures 2 & 3**)

136 with the only exception of strains with inferred changes in ploidy level (**Methods,**  
137 **Supplementary Figure 4**). iii) PC2 explained  $13\% \pm 6\%$  of variation and consistently  
138 attributed higher variation to one of the two groups. This strong signal of genomic windows  
139 separating into two discrete groups suggested that the genomic diversity in this collection was  
140 derived from two distinct populations. However, iv) group membership of strains changes  
141 among windows moving along the genome, reflecting recombination between these two well  
142 defined groups. This last point highlights the importance of considering haplotype structure  
143 and explains the lack of observed population structure when disregarding non-independence  
144 of SNPs (Jeffares et al., 2015).

145

146 The strong signal from the PCA that systematically differentiates between groups along the  
147 genome were likewise reflected in population genetic summary statistics including  
148 Watterson's theta ( $\theta$ ), pairwise nucleotide diversity ( $\pi$ ), and Tajima's D (**Figure 1d and 2**).  
149 Significant differences in these statistics (Kendall's  $\tau$  p-value  $\leq 2.2 \times 10^{-16}$ ), were also present  
150 in mitochondrial genetic variation (**Figure 1a**), allowed polarising the two groups across  
151 windows into a 'low-diversity' group (red) and a 'high-diversity group (blue) (**Figure 1a,**  
152 **Supplementary Figure 5**). Genetic divergence between groups ( $D_{xy}$ ) was 15 and 3 times  
153 higher than mean genetic diversity ( $\pi$ ) within each group, respectively, and thus supports a  
154 period of independent evolution. Painting genomic windows by group membership revealed  
155 blocks of ancestry distributed in sample specific patterns along the genome (**Figure 1c,**  
156 **Supplementary Figure 6**). The sample corresponding to the reference genome isolated  
157 originally from Europe (Leupold's 972; JB22) consisted almost exclusively of 'red' ancestry  
158 (>96% red), whereas other samples were characterized near-exclusively by 'blue' ancestry  
159 (>96% blue). The sample considered to be a different species from Asia, *S. kambucha*  
160 (JB1180 (Singh and Klar, 2002)) had a large proportion of 'blue' windows (>70% blue).

161 Hereafter, we refer to the 'red' and 'blue' clade as *Sp* and *Sk*, for *S. pombe* and *S. kambucha*  
162 respectively. Grouping samples by the pattern of genomic ancestry across the genome  
163 revealed 8 discrete clusters (**Figure 1c**). Consistent with independent and/or recent  
164 segregation of ancestral groups, cluster membership for several samples differed between  
165 chromosomes (**Figure 1c**) and genome components (**Supplementary Figures 7 & 8**). This is  
166 also reflected by low support in the relationship between the 8 discrete clusters.  
167  
168 The distribution of ancestry components was highly heterogeneous across the chromosome  
169 (**Figure 2a, Supplementary Figure 6**). Most strains showed an excess of *Sp* ancestry in parts  
170 of chromosome I, whereas several regions of chromosome III had an excess of *Sk* ancestry.  
171 Failing to incorporate this genome-wide variation of admixture proportions can mimic  
172 signatures of selection. For example, equal ancestry contributions for a certain genomic  
173 region will yield high positive values of both Tajima's D (**Supplementary Figure 9**) and  $\pi$   
174 and may be mistaken as evidence for balancing selection. Strong skew in ancestry proportions  
175 reduces both statistics to values of the prevailing ancestry and may appear as evidence for  
176 selective sweeps (**Figure 2b**). Taking ancestry into account, however, there was no clear  
177 signature of selection in either *Sp* or *Sk* genetic variation that could account for heterogeneity  
178 in the genetic composition of hybrids (**Supplementary Figure 9**). Signatures of selection  
179 identified previously (cf. Fawcett et al., 2014) are likely artefacts due to skewed ancestry  
180 proportions rather than events of positive or balancing selection in the ancestral populations.  
181  
182 Overall, our results provide strong evidence for the presence of at least two divergent  
183 ancestral populations: one genetically diverse group (*Sk* clade) and a less diverse group (*Sp*  
184 clade). We found a large range of ancestral admixture proportions between these two clades  
185 broadly clustering samples into 8 weakly supported groups. These resemble clusters of strains

186 previously identified by *Structure* and *fineStructure* without explicit modelling of ancestral  
187 admixture (Jeffares et al., 2015). Neglecting ancestry, Jeffares et al. (2015) argued that the  
188 shallow population structure likely results from extensive gene flow between clusters. Yet,  
189 considering the genome-wide distribution of *Sk* and *Sp* ancestry, and lack of geographical  
190 structure, suggest that the 8 clusters are derived from one or a few centres of ancient  
191 admixture (hybridization) without the need of subsequent or recent gene flow between them.

192

### 193 **Age of ancestral lineages and timing of hybridization**

194 To shed further light on the population history, we estimated the age of the parental lineages  
195 and the timing of initial hybridization. Calibrating mitochondrial divergence by known  
196 collection dates over the last 100 years, Jeffares et al. (2015) estimated that the time to the  
197 most recent common ancestor for all samples was around 2,300 years ago. Current  
198 overrepresentation of near-pure *Sp* and *Sk* in Europe or Africa / Asia, respectively, is  
199 consistent with an independent history of the parental lineages on different continents for the  
200 most part of the last millennia (**Supplementary Figure 8**). Yet, the variety of admixed  
201 genomes bears testimony to the fact that isolation has been disrupted by heterospecific gene  
202 flow. Using a theoretical model assuming secondary contact with subsequent hybridization  
203 (Janzen et al., 2018) we estimated that hybridization occurred within the last 20 sexual  
204 outcrossing generations (**Figure 3, Supplementary Figures 10 & 11**). Considering  
205 intermittent generations of asexual reproduction, high rates of haploid selfing and dormancy  
206 of spores (Farlow et al., 2015; Jeffares, 2018) it is difficult to obtain a reliable estimate of  
207 time in years. This recent estimate of hybridization is consistent with hybridization induced  
208 by the onset of regular trans-continental human trade between Europe with Africa and Asia  
209 (~14th century) and with the Americas (~16th century), with fission yeast as a human  
210 commensal (Jeffares, 2018). This fits with the observation that all current samples from the



211 Americas were hybrids, while samples with the purest ancestry stem from Europe, Africa and  
212 Asia. Moreover, negative genome-wide Tajima's D estimates for both ancestral clades (mean  
213  $\pm$  SD for *Sp*:  $-0.8 \pm 0.9$  and *Sk*:  $-0.7 \pm 0.6$ ) signal a period of recent expansion.

214

## 215 **Heritable phenotypic variation and reproductive isolation are governed by ancestry** 216 **components**

217 Hybridization can lead to rapid evolution due to selection acting on the genetic and  
218 phenotypic variation emerging after admixture (Muller, 1932; Fisher, 1999; McDonald et al.,  
219 2016). We assessed the consequences of hybridization on phenotypic variation making use of  
220 a large data set including 228 quantitative traits collected from the strains under consideration  
221 here (Jeffares et al., 2015). Contrary to genetic clustering of hybrid genomes (**Figure 1c**),  
222 samples with similar ancestry proportions did not group in phenotypic space described by the  
223 first two PC-dimensions capturing 31% of the total variance across traits (**Figure 4a**).  
224 Moreover, phenotypic variation of hybrids exceeded variation of pure strains ( $>0.9$  ancestry  
225 for *Sp* or *Sk*). This was supported by trait specific analyses. We divided samples into three  
226 discrete groups: pure *Sp*, pure *Sk* and hybrids with a large range of *Sp* admixture proportions  
227 (0.1-0.9). 63 traits showed significant difference among groups (**Figure 4b, Supplementary**  
228 **Figure 12**). In the vast majority of cases (50 traits), hybrid phenotypes were indistinguishable  
229 from one of the parents, but differed from the other, suggesting dominance of one ancestral  
230 background, consistent with some ecological separation of the backgrounds. In seven traits,  
231 hybrid phenotypes were intermediate differing from both parents, indicative of an additive  
232 contribution of both ancestral backgrounds. For six traits, hybrids exceeded phenotypic values  
233 of both parents providing evidence for transgressive segregation. In all cases, the number of  
234 significantly differentiated traits was found to be higher than under the null model (mean  
235 number of significant traits after 10000 permutations: dominant *Sk*  $4 \pm 2$ , dominant *Sp*  $4 \pm$

236 2, transgressive 0 +/- 0.3, intermediate 0 +/- 0.1; **Supplementary Figure 13**). Jeffares et al.  
237 (2017) showed that for each trait the total proportion of phenotypic variance explained by the  
238 additive genetic variance component (used as an estimated of the narrow-sense heritability)  
239 ranged from 0 to around 90%. We found that across all 228 traits, considering *Sp* and *Sk*  
240 ancestry components across the 1,925 genomic windows explained an equivalent amount of  
241 phenotypic variance as all 172,935 SNPs segregating across all samples, being both highly  
242 correlated (**Figure 4c, 4d**;  $r = 0.82$ ,  $p\text{-value} \leq 2.2 \cdot 10^{-16}$ ). Combinations of ancestral genetic  
243 variation appear to be the main determinants of heritable phenotypic variation with only little  
244 contribution from single-nucleotide mutations arising after admixture. In turn, this supports  
245 that the formation of hybrids is recent (see above), and few (adaptive) mutations have  
246 occurred after it.

247

248 Ancestry also explained most of the variation in postzygotic reproductive isolation between  
249 strains. Previous work revealed a negative correlation between spore viability and genome-  
250 wide SNP divergence between strains (Jeffares et al., 2015). The degree of similarity in  
251 genome-wide ancestry had the same effect: the more dissimilar two strains were in their  
252 ancestry, the lower the viability of the resulting spores (**Figure 4e**; Kendall correlation  
253 coefficients,  $\tau = -0.30$ ,  $T = 259$ ,  $p\text{-value} = 6.66 \cdot 10^{-3}$ ). This finding is consistent with  
254 reproductive isolation being governed by many, genome-wide incompatibilities between the  
255 *Sp* and *Sk* clade. Yet, in a number of cases spore survival was strongly reduced in strain  
256 combinations with near-identical ancestry. In these cases, reproductive isolation may be  
257 caused by few large effect mutations, including structural genomic changes that arose after  
258 hybridization.

259

260 **Structural mutations do not determine the genome-wide distribution of ancestry blocks**

261 Structural genomic changes (structural variants or SVs hereafter) are candidates for large-  
262 effect mutations governing phenotypic variation (Küpper et al., 2016; Jeffares et al., 2017),  
263 reproductive isolation (Hoffmann and Rieseberg, 2008; Teresa Avelar et al., 2013) and  
264 heterospecific recombination (Ortiz-Barrientos et al., 2016). They may thus importantly  
265 contribute to shaping heterogeneity in the distribution of ancestry blocks observed along the  
266 genome (Jay et al., 2018; Poelstra et al., 2014) (**Figure 2b**). However, inference of SVs in  
267 natural strains of fission yeast has been primary based on short-read sequencing (Jeffares et al.,  
268 2017). SV calls from short-read sequencing data are known to differ strongly by bioinformatic  
269 pipeline, are prone to false positive inference and are limited in their ability to infer long-  
270 range SV, in particular in repetitive regions of the genome (Jeffares et al., 2017).

271  
272 To obtain a reliable and comprehensive account of SV segregating across strains and test for a  
273 possible association of SVs with the skewed ancestry in the genome, we generated  
274 chromosome-level *de novo* genome assemblies for 17 of the most divergent samples using  
275 single-molecule real time sequencing (mean sequence coverage 105x; **Supplementary Table**  
276 **7**). For the purpose of methodological comparison, we also generated *de novo* assemblies for  
277 a subset of 8 strains (including the reference Leupold's 972) based on nanopore sequencing  
278 (mean sequence coverage: 140x). SVs were called using a mixed approach combining  
279 alignment of *de novo* genomes and mapping of individual reads to the reference genome  
280 (Wood et al., 2002). Both approaches and technologies yielded highly comparable results  
281 (**Methods, Supplementary Figure 14-17 and Supplementary Table 8**).

282  
283 After quality filtering, we retained a total of 832 variant calls including 563 insertions or  
284 deletions (indels), 118 inversions, 110 translocations and 41 duplications. The 17 strains we  
285 examined with long reads could be classified into six main karyotype arrangements (**Figure**

286 **5a**). The previously reported list of SVs of the same strains using short reads consisted of only  
287 52 SVs (Jeffares et al., 2017) of which only 8 were found to overlap with the 832 calls from  
288 long-read data. The vast majority of SVs were smaller than 10 kb (**Figure 5b**). The size  
289 distribution was dominated by elements of 6 kb and 0.5 kb in length corresponding to known  
290 transposable elements (TEs) and their flanking long terminal regions (LTRs), respectively  
291 (Kelly and Levin, 2005). Only a small number of SVs corresponded to large-scale  
292 rearrangements (50 kb - 2.2 Mb) including translocations between chromosomes (**Figure 5a**).  
293 A subset of these have been characterized previously as large-effect modifiers of  
294 recombination promoting reproductive isolation (Brown et al., 2011; Teresa Avelar et al.,  
295 2013; Jeffares et al., 2017).

296

297 Contrary to previous SV classification based on short reads (Jeffares et al., 2017), SV density  
298 was not consistently increased in repetitive sequences such as centromeric and telomeric  
299 regions illustrating the difficulty of short-read data in resolving SV in repetitive regions  
300 (**Figure 5c**). Instead, we found that the frequency of SV was significantly elevated in close  
301 proximity to developmentally programmed DNA double-strand breaks (DSB) associated with  
302 recombination initiation (Fowler et al., 2014). The proportion of SV observed within [0, 0.5)  
303 kb and [0.5, 1) kb of DSB was increased by 46% ( $p\text{-value} < 1 \times 10^{-04}$ ) and 67% ( $p\text{-}$   
304  $\text{value} < 1 \times 10^{-04}$ ) relative to random expectations. On the contrary, regions more distant than 10  
305 kb from DSB were relatively depleted of SV (**Supplementary Figure 18**).

306

307 Next, we imputed the ancestry of SV alleles from SNPs surrounding SV break points. We  
308 calculated allele frequencies for SV in both ancestral clades and constructed a folded two-  
309 dimensional site frequency spectrum (**Figure 5d**). The majority of variants (66 %) segregated  
310 at frequencies below 0.3 in both ancestral genetic backgrounds. Very few SVs were

311 differentiated between ancestral populations (3 % of variants with frequency higher than 0.9  
312 in one population and below 0.1 in the other). This pattern contrasted with the reference  
313 spectrum derived from SNPs where the proportion of low frequency variants was similar at  
314 60 %, but genetic differentiation between populations was substantially higher (21 % of SNP  
315 variants with frequency higher than 0.9 in one population and below 0.1 in the other). The  
316 difference was most pronounced for large SVs (larger than 10 kb) and TEs, for which we  
317 estimated allele frequencies for all 57 strains by means of PCR and short-read data,  
318 respectively. For TE's, 98 % of the total 1048 LTR variants segregated at frequencies below  
319 0.3 in both ancestral populations without a single variant differentiating ancestral populations  
320 (**Figure 5d**). Large SVs likewise segregated at low frequencies, being present at most in two  
321 strains out of 57. This included the translocation reported for *S. kambucha* between  
322 chromosome II and III (Zanders et al., 2014), which we found to be specific for that strain.  
323 Only the large inversion on chromosome I segregated at higher frequency being present in  
324 five strains out of 57, of which three were of pure *Sp* ancestry including the reference strain  
325 (**Supplementary Table 10**). Additionally, SV segregating at high frequency ( $> 0.7$ ) tended to  
326 cluster in genomic regions with steep transitions in ancestry between *Sp* and *Sk* ancestry (p-  
327 value  $> 0.1$ ; **Supplementary Figure 19**).

328

329 In summary, long-read sequencing provided a detailed account of species-wide diversity in  
330 structural genetic variation including over 800 high-quality variants ranging from small indels  
331 to large-scale inter-chromosomal rearrangements. SV calls showed substantial overlap among  
332 technologies (Pacific Biosciences, Nanopore) and approaches (de novo assembly vs.  
333 mapping), but less than 1 % of this variation was inferred from short-read data. This finding  
334 admonishes to caution when interpreting SV calls from short read data that is moreover  
335 sensitive to genotyping methods. In contrast to genome-wide SNPs, SVs segregated near-

336 exclusively at low frequencies and were rarely differentiated by ancestral origin. This is  
337 consistent with strong diversity-reducing purifying selection relative to SNPs. The fact that  
338 SVs, including large-scale rearrangements with known effects on recombination and  
339 reproductive isolation (Brown et al., 2011; Teresa Avelar et al., 2013; Zanders et al., 2014),  
340 were often unique to single strains precludes a role of SVs in shaping patterns of ancestral  
341 heterospecific recombination. Moreover, while being concentrated in proximity to double-  
342 strand breaks, possibly due to improper repair upon recombination (Currall et al., 2013), SV  
343 were not significantly associated with steep transitions in ancestry blocks. Summarizing the  
344 evidence, SV appears to have had little influence in shape genome-wide patterns of ancestral  
345 admixture and cannot explain the prevalence of reproductive isolation as a function on  
346 ancestral similarity (**Figure 4e**).

347

#### 348 **Negative epistasis shapes the distribution of ancestral blocks**

349 Alternatively, heterogeneity in the distribution and frequency of ancestry along the genome  
350 may result from negative epistatic interactions of incompatible genetic backgrounds (Schumer  
351 et al., 2016). An excess of homospecific combinations of physically distant loci can serve as  
352 an indication of epistatic selection against genetic incompatibilities which can be segregating  
353 at appreciable frequencies even within species (Corbett-Detig et al., 2013). We tested this  
354 hypothesis by measuring ancestry disequilibrium (AD) between all possible pairs of genomic  
355 windows within a chromosome. Specifically, we quantified linkage disequilibrium (LD)  
356 between windows dominated by alleles from the same ancestral group ( $> 0.7$ )  $Sp-Sp$  or  $Sk-Sk$   
357 (reflecting positive AD) and contrasted it to the degree of linkage disequilibrium arising  
358 between heterospecific allele combinations  $Sp-Sk$  (negative AD) (**Supplementary Figure 20**).  
359 LD differed significantly between these two cases (**Figure 6**). While negative AD decreased  
360 rapidly with genetic distance ( $R^2 < 0.2$  after 66, 19 and 21 kb respectively for each

361 chromosome) positive LD was higher in magnitude and extended over larger distances ( $R^2 <$   
362 0.2 after 1.02, 0.54, and 0.18 Mb respectively for each chromosome in *Sk-Sk* comparisons and  
363 1.59, 1.12, and 0.32 Mb for *Sp-Sp* comparisons). These results are consistent with a role of  
364 epistatic selection during the course of hybridization shaping the ancestry composition of  
365 admixed genomes.

366

## 367 **Discussion**

368 This study adds to the increasing evidence that hybridization plays an important role as a  
369 rapid, 'creative' evolutionary force in natural populations (Seehausen, 2004; Mallet, 2007;  
370 Soltis and Soltis, 2009; Abbott et al., 2013; Schumer et al., 2014; Abbott et al., 2016; Pennisi,  
371 2016; Nieto Feliner et al., 2017). Recent heterospecific recombination between two ancestral  
372 *S. pombe* populations shuffled genetic variation of genomes that diverged since classical  
373 antiquity about 2,300 years ago. The timing of hybridization coincided with the onset of  
374 intensified trans-continental human trade, suggesting an anthropogenic contribution. Several  
375 samples showed similar distribution of ancestral blocks along the genome suggesting  
376 comparable evolutionary histories, and allowing the identification of 8 discrete clusters. These  
377 clusters, in general showed weak geographical grouping, initially interpreted as evidence for  
378 reduced population structure with large recent world-wide gene flow (Jeffares et al., 2015). In  
379 contrast, the world-wide distribution of the two ancestral lineages suggests rapid and recent  
380 global dispersion after hybridization followed by local differentiation. This study thus  
381 highlights the importance of taking genomic non-independence into account. Allowing for the  
382 fact that genomes are mosaics reflecting different evolutionary histories can fundamentally  
383 alter inference on a species' evolutionary history.

384

385 Moreover, conceptualizing genetic variation as a function of ancestry blocks alternating along  
386 the genome changes the view on adaptation. Admixture is significantly faster than  
387 evolutionary change solely driven by mutation. Accordingly, phenotypic variation was near-  
388 exclusively explained by ancestry components with only little contribution from novel  
389 mutations. Importantly, admixture not only filled the phenotypic space between parental  
390 lineages, but also promoted transgressive segregation in several hybrids. This range of  
391 phenotypic outcomes opens the opportunity for hybrids to enter novel ecological niches  
392 (Nolte and Sheets, 2005; Pfennig et al., 2016) and track rapid environmental changes  
393 (Eroukhmanoff et al., 2013).

394  
395 Structural mutations have been described as prime candidates for rapid large-effect changes  
396 with implications on phenotypic variation, recombination and reproductive isolation (Faria  
397 and Navarro, 2010; Ortiz-Barrientos et al., 2016; Wellenreuther and Bernatchez, 2018). This  
398 study contributes to this debate providing a detailed account of over 800 high-quality  
399 structural variants identified across 17 chromosome level *de novo* genomes sampled from the  
400 most divergent strains within the species. On the whole, SVs had little effect. While large-  
401 scale rearrangements in specific strains have been shown to affect fitness (Teresa Avelar et al.,  
402 2013; Nieuwenhuis et al., 2018) and promote reproductive isolation between specific strains  
403 in *S. pombe* (Brown et al., 2011; Teresa Avelar et al., 2013), reproductive isolation was  
404 overall best predicted by the degree of shared ancestry with little contribution from SVs. SVs  
405 segregated at low frequencies in both ancestral populations and, contrary to what has been  
406 suggested for specific genomic regions in other systems (Jay et al., 2018), they did not  
407 account for genome-wide heterogeneity in introgression among strains during hybridization.  
408 Much rather, analyses of ancestry disequilibrium suggest a role for negative epistasis between  
409 multiple ancestry-specific loci spread across the genome rather than single major effect



410 mutations such as selfish elements or meiotic drivers (Zanders et al., 2014; Hu et al., 2017;  
411 Nuckolls et al., 2017). Functional work is needed to identify the genetic elements conveying  
412 reproductive isolation.

413

## 414 **Material and Methods**

### 415 **Strains**

416 This study is based on a global collection of *S. pombe* consisting of 161 world-wide  
417 distributed strains (see **Supplementary Table 1**) described in Jeffares *et al.* (2015).

418

### 419 **Inferring ancestry components**

420 To characterize genetic variation across all strains, we made use of publically available data in  
421 variant call format (VCF) derived for all strains from Illumina sequencing with an average  
422 coverage of around 80x (Jeffares et al., 2015). The VCF file consists of 172,935 SNPs  
423 obtained after read mapping to the *S. pombe* 972 h<sup>-</sup> reference genome (ASM294v264) (Wood  
424 et al., 2003) and quality filtering (see **Supplementary Table 1** for additional information).

425 We used a custom script in R 3.4.3 (Team, 2014) with the packages *gdsfmt* 1.14.1 and  
426 *SNPRelate* 1.12.2 (Zheng et al., 2017, 2012), to divide the VCF file into genomic windows of  
427 200 SNPs with overlap of 100 SNPs. This resulted in 1925 genomic windows of 1 - 89 kb in  
428 length (mean 13 kb). For each window, we performed principal component analyses (PCA)  
429 using *SNPRelate* 1.12.2 (Zheng et al., 2017, 2012) (example in **Figure 1a** and

430 **Supplementary Figure 1**). The proportion of variance explained by the major axis of

431 variation (PC1) was consistently high and allowed separating strains into two genetic

432 groups/clusters, *Sp* and *Sk* (see main text, **Figure 1b**). We calculated population genetic

433 parameters within clusters including pairwise nucleotide diversity ( $\pi$ ) (Nei and Li, 1979),

434 Watterson theta ( $\theta_w$ ) (Watterson, 1975), and Tajima's *D* (Tajima, 1989), as well as the

435 average number of pairwise differences between clusters ( $D_{xy}$ ) (Nei and Li, 1979) using  
436 custom scripts. Statistical significance of the difference in nucleotide diversity ( $\pi$ ) between  
437 ancestral clades was inferred using Kendall's  $\tau$  as test statistic. Since values of adjacent  
438 windows are statistically non-independent due to linkage, we randomly subsampled 200  
439 windows along the genome with replacement. This was repeated a total of 10 times for each  
440 test statistic, and we report the maximum p-value. Given the consistent difference between  
441 clusters (**Figure 1** and **Supplementary Figure 2, 3 and 5**), normalised PC score could be  
442 used to attribute either  $Sp$  (low-diversity) or  $Sk$  (high-diversity) ancestry to each window  
443 (summary statistics for each window are given in **Supplementary Table 2**). This was  
444 performed both for the subset of 57 samples (**Figure 1c**) and for all 161 samples  
445 (**Supplementary Figure 6**). Using different window sizes (100, 50 and 40 SNPs with overlap  
446 of 50, 25 and 20 respectively) yielded qualitatively the same results. Intermediate values in  
447 PC1 (between 0.25 and 0.75) were only observed in few, sequential windows where samples  
448 transitioned between clusters (**Supplementary Figure 3**). The only exception was sample  
449 JB1207, which we found to be diploid (for details see below).

450

#### 451 **Population structure after hybridization**

452 To characterise the genome-wide distribution of ancestry components along the genome, we  
453 ran a hierarchical cluster analysis on the matrix containing ancestry information ( $Sp$  or  $Sk$ ) for  
454 each window (columns) and strain (rows) using the R package *Pvclust 2.0.0* (Suzuki and  
455 Shimodaira, 2006). *Pvclust* includes a multiscale bootstrap resampling approach to calculate  
456 approximately unbiased probability values (p-values) for each cluster. We specified 1000  
457 bootstraps using the Ward method and a Euclidian-based dissimilarity matrix. The analysis  
458 was run both for the whole genome (**Figure 1c**) and by chromosome (**Figure 1c**,  
459 **Supplementary Figure 7**).

460

## 461 **Phylogenetic analysis of the mitochondrial genome**

462 From the VCF file, we extracted mitochondrial variants for all 161 samples (Jeffares et al.,  
463 2015) and generated an alignment in *.fasta* format by substituting SNPs into the reference *S.*  
464 *pombe* 972 h– reference genome (ASM294v264) using the package *vcf2fasta*  
465 (<https://github.com/JoseBlanca/vcf2fasta/>, version Nov. 2015). We excluded variants in  
466 mitochondrial regions with SVs inferred from long reads. A maximum likelihood tree was  
467 calculated using *RaxML* (version 8.2.10-gcc-mpi) (Stamatakis, 2014) with default parameters,  
468 GTRGAMMAI approximation, final optimization with GTR + GAMMA + I and 1000  
469 bootstraps. The final tree was visualised using *FigTree* 1.4.3  
470 (<http://tree.bio.ed.ac.uk/software/figtree/>) (**Supplementary Figure 8**).

471

## 472 **Time of hybridization**

473 Previous work (Jeffares et al., 2015) has shown that the time to the most recent common  
474 ancestor for 161 samples dates back to around 2300 years ago. This defines the maximum  
475 boundary for the time of hybridization. We used the theoretical model by Janzen et al., (2018)  
476 to infer the age of the initial hybridization event. The model predicts the number of ancestry  
477 blocks and junctions present in a hybrid individual as a function of time and effective  
478 population size ( $N_e$ ). First, we obtained an estimate of  $N_e$  using the multiple sequential  
479 Markovian coalescent (MSMC). We constructed artificial diploid genomes from strains with  
480 consistent clustering by ancestry (**Figure 1c**) and estimated change in  $N_e$  as function across  
481 time using *MSMC 2-2.0.0* (Schiffels and Durbin, 2014). In total we took four samples per  
482 group and produced diploid genomes in all possible six pairs for each group, except for one  
483 cluster that had only two samples (JB1205 and JB1206). Bootstraps were produced for each  
484 analysis, subsampling 25 genomic fragments per chromosome of 200 kb each. Resulting

485 effective population size and time was scaled using reported mutation rate of  $2 \cdot 10^{-10}$   
486 mutations site<sup>-1</sup> generation<sup>-1</sup> (Farlow et al., 2015). Although it is difficult to be certain of the  
487 number of independent hybridization events, it is interesting to see that some clusters show  
488 similar demographic histories (**Supplementary Figure 21**). Regardless of the demographic  
489 history in each cluster, long-term  $N_e$  as estimated by the harmonic mean ranged between  $1 \cdot$   
490  $10^5$  and  $1 \cdot 10^9$ .  $N_e$  of the near-pure ancestral *Sp* and *Sk* cluster was  $7 \cdot 10^5$  and  $9 \cdot 10^6$ ,  
491 respectively. These estimates of  $N_e$  are consistent with previous reports of  $1 \cdot 10^7$  (Farlow et  
492 al., 2015).

493 We then used a customised R script with the ancestral component matrix to estimate the  
494 number of ancestry blocks (*Sp* or *Sk* clade) (**Supplementary Figure 10**). We used the R script  
495 from Janzen et al., (2018), and ran the model in each sample and chromosome using:  $N_e = 1 \cdot$   
496  $10^6$ ,  $r =$  number of genomic windows per chromosome,  $h0 = 0.298$  (mean heterogeneity ( $h0$ )  
497 was estimated from the ancestral haplotype matrix) and  $c = 7.1, 5.6,$  and  $4.1$  respectively for  
498 chromosome I, II and III (values taken from Munz et al. (1989)) (**Supplementary Figure 11**).

499 Given the large  $N_e$ , no changes in mean heterogeneity is expected over time after  
500 hybridization due to drift (the proportion of ancestral haplotypes *Sp* and *Sk* in hybrids,  
501 estimated as  $2pq$ , where  $p$  and  $q$  are the proportion of each ancestral clade in hybrids).  
502 Accordingly, results did not change within the range of the large  $N_e$  values. For this analysis,  
503 samples with proportion of admixture lower than 0.1 were excluded.

504

### 505 **Phenotypic variation and reproductive isolation**

506 We sourced phenotypic data of 229 phenotypic measurements in the 161 strains including  
507 amino acid quantification on liquid chromatography (aaconc), growth and stress on solid  
508 media (smgrowth), cell growth parameters and kinetics in liquid media (lmgrowth) and cell  
509 morphology (shape1 and shape2) from Jeffares et al. (2015). Data on reproductive isolation

510 measured as the percentage of viable spores in pairs of crosses were compiled from Jeffares et  
511 al. (2015) and Marsellach (2017). A summary of all phenotypic measurements and  
512 reproductive data is provided in **Supplementary Table 4** and **5**, respectively.

513

514 First, we normalized each phenotypic trait  $y$  using rank-based transformation with the  
515 relationship  $\text{normal.y} = \text{qnorm}(\text{rank}(y) / (1 + \text{length}(y)))$ . We then conducted PCA on  
516 normalized values of all phenotypic traits using the R package *missMDA* 1.12 (Josse and  
517 Husson, 2016). We estimated the number of dimensions for the principal component analysis  
518 by cross-validation, testing up to 30 PC components and imputing missing values. In addition  
519 to PCA decomposing variance across all traits, we examined the effect of admixture on each  
520 trait separately. Samples were divided into three discrete categories of admixture: two groups  
521 including samples with low admixture proportions (proportion of *Sp* or *Sk* clades higher than  
522 0.9), and one for hybrid samples (proportion of *Sp* or *Sk* clades between 0.1 to 0.9).

523 Significant differences in phenotypic distributions between groups were tested using *Tukey*  
524 *Honest Significant Differences* as implemented in *Stats* 3.4.2 (Team, 2014). **Supplementary**  
525 **Figure 12** shows the distribution of phenotypic values by admixture category for each trait.

526 The number of traits with significant differences among groups was contrasted to values  
527 obtained by randomising admixture categories without replacement (permutations of the *Sp*,  
528 *Sk*, or *hybrid* category). Observed values were contrasted with distribution of the expected  
529 number of significant traits after running 10000 independent permutations (**Supplementary**  
530 **Figure 13**).

531

### 532 **Heritability**

533 Heritability was estimated for all normalized traits using *LDAK* 5.94 (Speed et al., 2012),  
534 calculating independent kinship matrices derived from: 1) all SNPs and 2) ancestral

535 haplotypes. Both SNPs and haplotype data were binary encoded (0 or 1). Jeffares et al. (2015)  
536 showed that heritability estimates between normalised and raw values are highly correlated ( $r$   
537 = 0.69,  $p$ -value  $\leq 2.2 \cdot 10^{-16}$ ). Heritability estimated with SNP values were strongly correlated  
538 with those from ancestral haplotypes ( $r = 0.82$ ,  $p$ -value  $\leq 2.2 \cdot 10^{-16}$ ). Heritability estimates  
539 and standard deviation for each trait for both SNP and ancestral haplotypes are detailed in  
540 **Supplementary Table 6.**

541

#### 542 **Identification of ploidy changes**

543 *S. pombe* is generally considered haploid under natural conditions. Yet, for two samples  
544 ancestry components did not separate on the principle component axis 1 (see above) for much  
545 of the genome. Instead, these samples were intermediate in PC1 score. A possible explanation  
546 is diploidisation of the two ancestral genomes. To establish the potential ploidy of samples,  
547 we called variants for all 161 samples using the Illumina data from Jeffares *et al* (2015) .  
548 Cleaned reads were mapped with *BWA* (version 0.7.17-r1188) in default settings and variants  
549 were called using *samtools* and *bcftools* (version 1.8). After filtering reads with a QUAL  
550 score  $> 25$ , the number of heterozygous sites per base per 20kb window were calculated.  
551 Additionally the nuclear content (C) as measured by Jeffares et al. (2015) (Supplementary  
552 Table S4 in Jeffares *et al* (2015)) were used to verify increased ploidy. Two samples showed  
553 high heterozygosity along the genome (JB1169 and JB1207) of which JB1207 for which data  
554 were available also showed a high C-value, suggesting that these samples are diploid  
555 (**Supplementary Figures 4 & 22**). In JB1207, heterozygosity varies along the genome, with  
556 regions of high and low diversity. Assigning ancestry (see **Supplementary Figure 6**), shows  
557 that the haploid parents differed from each other and that both chromosomes stem from  
558 hybrids between the *Sp* and *Sk* clades. Sample JB1110 showed genomic content similar to

559 JB1207, but did not show heterozygosity levels above that of haploid strains, suggesting the  
560 increase in genome content occurred by autopoloidization.

561

### 562 **High-weight genomic DNA extraction and whole genome sequencing**

563 To obtain high weight gDNA for long-read sequencing, we grew strains from single colonies  
564 and cultured them in 200 mL liquid EMM at 32 °C shaking at 150 r.p.m. overnight. Standard  
565 media and growth conditions were used throughout this work (Hagan et al., 2016) with minor  
566 modifications: We used standard liquid Edinburgh Minimal Medium (EMM; Per liter:

567 Potassium Hydrogen Phthalate 3.0 g, Na HPO<sub>4</sub>·2H<sub>2</sub>O 2.76 g, NH<sub>4</sub>Cl 5.0 g, D-glucose 20 g,

568 MgCl<sub>2</sub>·6H<sub>2</sub>O 1.05 g, CaCl<sub>2</sub>·2H<sub>2</sub>O 14.7 mg, KCl 1 g, Na<sub>2</sub>SO<sub>4</sub> 40 mg, Vitamin Stock ×1000

569 1.0 ml, Mineral Stock ×10,000 0.1 ml, supplemented with 100 mg l<sup>-1</sup> adenine and 225 mg l<sup>-1</sup>

570 leucine) for the asexual growth. DNA extraction was performed with Genomic Tip 500/G or

571 100/G kits (Qiagen) following the manufacturer's instruction, but using Lallzyme MMX for

572 lysis (Flor-Parra et al 2014, doi:10.1002/yea.2994). For each sample, 20 kb libraries were

573 produced that were sequenced on one SMRT cell per library using the Pacific Biosciences

574 RSII Technology Platform (PacBio®, CA). For a subset of eight samples, additional

575 sequencing was performed using Oxford Nanopore (MinION). Sequencing was performed at

576 SciLifeLab, Uppsala, Gene centre LMU, Munich and The Genomics & Bioinformatics

577 Laboratory, University of York. We obtained on average 80x (SMRT) and 140x (nanopore)

578 coverage for the nuclear genome for each sample (summary in **Supplementary Table 7**).

579

580 Additionally, 2.5 µg of the same DNA was delivered to the SNP&SEQ Technology Platform

581 at the Uppsala Biomedical Centre (BMC), for Illumina sequencing. Libraries were prepared

582 using the TruSeq PCRfree DNA library preparation kit (Illumina Inc.). Sequencing was

583 performed on all samples pooled into a single lane, with cluster generation and 150 cycles

584 paired-end sequencing on the HiSeqX system with v2.5 sequencing chemistry (Illumina Inc.).

585 These data were used for draft genome polishing (see below).

586

### 587 ***De novo* assembly of single-molecule read data**

588 *De novo* genomes were assembled with *Canu* 1.5 (Koren et al., 2017) using default

589 parameters. BridgeMapper from the *SMRT* 2.3.0 package was used to polish and subsequently

590 assess the quality of genome assembly. Draft genomes were additionally polishing using short

591 Illumina reads, running four rounds of read mapping to the draft genome with *BWA* 0.7.15

592 and polishing with *Pilon* 1.22 (Walker et al., 2014). Summary statistics of the final assembled

593 genomes are found in **Supplementary Table 7**. *De novo* genomes were aligned to the

594 reference genome using *MUMmer* 3.23 (Kurtz et al., 2004). Contigs were classified by

595 reference chromosome to which they showed the highest degree of complementarity. We used

596 customised python scripts to identify and trim mitochondrial genomes.

597

### 598 **Structural variant detection**

599 Structural variants (SVs) were identified by a combination of a *de novo* and mapping

600 approach. *De novo* genomes were aligned to the reference genome using *MUMmer*, and SVs

601 were called using the function `show-diff` and the package *SVMU* 0.2beta (Khost et al., 2016).

602 Then, raw long reads were mapped to the reference genome with *NGMLR* and genotypes were

603 called using the package *Sniffles* (Sedlazeck et al., 2018). We implemented a new function

604 within *Sniffles* “forced genotypes”, which calls SVs by validating the mapping calls from an

605 existing list of breaking points or SVs. This reports the read support per variant even down to

606 a single read. We forced genotypes using the list of *de novo* breaking points to generate a

607 multi-sample VCF file. SVs were merged using the package *SURVIVOR* (Jeffares et al., 2017)

608 option `merge` with a threshold of 1kbp and requiring the same type. In total, it resulted in a list



609 of 1498 SVs with 892 in common between the mapping and *de-novo* approaches  
610 **(Supplementary Figure 14).**

611  
612 Within the 892 common variants we compared the accuracy of genotyping between sample by  
613 comparing genotypes obtained from *de novo* genomes and by mapping reads to reference  
614 genome. Additionally, we compared genotypes in samples sequenced with both PacBio and  
615 MinIon. In total we sequenced 8 samples with both technologies. We found high consistency  
616 for variants called with both sequencing technologies and observed that allele frequencies  
617 were highly correlated ( $r = 0.98$ ,  $p\text{-value} \leq 2.2 \times 10^{-16}$ ) **(Supplementary Figures 14 - 17).**

618 Only common SVs between the mapping and *de-novo* approach were considered, and variants  
619 with consistency below 50% were removed. We manually checked large SVs (larger than  
620 10kb) by comparing the list of SVs with the alignment of the *de novo* genomes to the  
621 reference genome from MUMmer. This resulted in a final data set with 832 SVs  
622 **(Supplementary Table 8).**

623  
624 **Distribution of SVs around developmentally programmed DNA double-strand breaks**  
625 **(DSB)**

626 We tested the association between DSB and SVs by comparing the physical genomic  
627 coordinates of the final list of SV with DSB locations accessed from Fowler et al., (2014).  
628 Maintaining the same number of SV per chromosome, we used a customized R script to  
629 randomise SV coordinates and measure the distances to the closest DSB. We counted the  
630 number of SV present within different intervals of physical genetic distance ([0,500), [500,  
631 1000), [1000, 2000), [2000, 4000), [4000, 10000), [10000, 20000), [20000, 30000) bp).  
632 Empirically observed values were contrasted with randomized distribution after running  
633 10000 independent permutations. P-values of differences between randomization and

634 observed values were obtained from the fraction of expected values higher than the observed  
635 value from the original data (**Supplementary Figures 18**).

636

### 637 **PCR validation of large SVs**

638 To test the frequency of large inversions and rearrangements observed from long read data,  
639 we performed PCR verification over the breakpoints in the 57 non-clone samples. PCR was  
640 performed for both sides of the breakpoints, with a combination of one primer ‘outside’ of the  
641 inversion and both primers ‘inside’ the inversion (**Supplementary Figure 23**). PCR were  
642 performed on DNA using standard *Taq* polymerase, with annealing temperature at 59°C. The  
643 primers used, the coordinates in the reference and the expected amplicon length are given in  
644 **Supplementary Table 9**.

645

### 646 **Distribution of structural variants in ancestral population – Two dimensional folded site 647 frequency spectrum**

648 We used the location of break points of SVs to identify whether a variant was located in the  
649 *Sp* or *Sk* genetic background in each sample. Ancestral haplotypes are difficult to infer in  
650 telomeric and centromeric regions given the low confidence in SNP calling in those regions,  
651 resulting in low percentage of variance explained by PC1. Thus SVs with break points in  
652 those regions were excluded from this analysis (19 SVs). SVs were grouped by ancestral  
653 group and allele frequencies were calculated for each ancestral population. We used these  
654 frequencies to build a two dimensional folded site frequency spectrum (2dSFS). In order to  
655 compare this 2dSFS, we repeated the analysis using SNP data from all 57 samples.  
656 Considering that the majority of identified SVs with long reads were transposable elements,  
657 we also made use of LRT insertion-deletion polymorphism (indels) inferred from short reads.

658 For this additional data we produced a similar folded 2d SFS. LTR indel data were taken from  
659 Jeffares et al., (2015) and are listed in **Supplementary Table 11**.

660

### 661 **Decay in linkage disequilibrium (LD)**

662 To contrast LD between alleles from alternative ancestral groups, we calculated LD between  
663 all described genomic windows within chromosomes (**Supplementary Figure 20**). For this  
664 analysis only hybrid samples were considered (strains with admixture proportion higher than  
665 0.1). For each pair of windows, we polarized windows by ancestry (at a threshold of > 0.7)  
666 and calculated standardized LD as the squared Pearson's correlation coefficient ( $R^2$ ) (Hill and  
667 Robertson, 1968; Weir, 1979). This measurement takes into consideration difference in allele  
668 frequencies. The expected value of  $R^2$  ( $E(R^2)$ ) can be approximated by (Hill and Weir, 1988):

$$669 \quad E(R^2) = \left( \frac{10 + C}{(2 + C) * (11 + C)} \right) * \left( 1 + \frac{(3 + C) * (12 + 12C + C^2)}{n * (2 + C) * (11 + C)} \right)$$

670 Where C corresponds to product between the genetic distance (bp) and the population  
671 recombination rate ( $\rho$ ) in n number of haplotype sampled. The population recombination rate  
672 was calculated as:  $\rho = 4 * N_e * c$ , where c is the recombination fraction between sites and  $N_e$   
673 is the effective population size. We fitted a nonlinear model to obtain least squares estimates  
674 of  $\rho$  using a customized R script. The decay of LD with physical distance can be described  
675 with this model (Remington et al., 2001). LD values were grouped in three categories: i)  
676 comparison between windows with high proportion ( $Sp > 0.7$ ) of  $Sp$  ancestral group ( $Sp-Sp$ ); ii)  
677 high proportion ( $Sk > 0.7$ ) of  $Sk$  ancestral group ( $Sk-Sk$ ); and iii) high proportion of opposite  
678 ancestral groups ( $Sp-Sk$ ). i) and ii) represent cases of positive ancestry disequilibrium, iii) will  
679 be denoted as negative ancestry disequilibrium.

680

### 681 **Data availability**

682 Nanopore, single-molecule real time sequencing data and de-novo genomes are available at  
683 NCBI Sequence Read Archive, BioProject ID XXX.

684  
685 **Acknowledgments**

686  
687 We thank Fidel Botero-Castro, Ana Catalán, Sebastian Höhna, Ulrich Knief, Claire Peart,  
688 Joshua Peñalba, Ricardo Pereira, Matthias Weissensteiner, (LMU Munich) and S. Lorena  
689 Ament-Velásquez (Uppsala University) for providing valuable intellectual input on the  
690 various analyses, sharing scripts and critically comment on the manuscript. We are further  
691 indebted to Bernadette Weissensteiner for extensive help with laboratory work and Saurabh  
692 Pophaly for bioinformatics support (LMU Munich). We further acknowledge support for data  
693 generation from the National Genomics Infrastructure, Uppsala, Sweden, the Gene Centre,  
694 Munich, Germany, Sally James and Peter Ashton from the Bioscience Technology Facility,  
695 Department of Biology, University of York, U.K, and James Chong, Department of Biology,  
696 University of York, U.K. The computational infrastructure was provided by the UPPMAX  
697 Next-Generation Sequencing Cluster and Storage (UPPNEX) project funded by the Knut and  
698 Alice Wallenberg Foundation and the Swedish National Infrastructure for Computing and the  
699 York Advanced Research Computing Cluster (YARCC), University of York, U.K. This study  
700 was funded by LMU Munich to JW and NHGRI UM1 HG008898 to FS.

701  
702 **Contributions**

703 ST, BN, DJ and JW conceived of the study; All analyses were performed by ST with  
704 contributions from FS in structural variation calling, JD in de novo assembly, BN in ancestral  
705 inference and population genetics parameters and DJ in phenotypic and heritability analyses;  
706 ST and JD assembled de-novo genomes; BN designed primers for PCR validation of  
707 structural variants; ST, BN, and JW wrote the manuscript with input from all other authors.

708  
709 **Competing Interests statement**

710 The authors declare no competing interests.

711  
712  
713  
714  
715  
716  
717  
718  
719  
720  
721  
722  
723  
724  
725  
726  
727  
728  
729  
730  
731  
732  
733  
734  
735  
736  
737  
738  
739  
740  
741  
742  
743  
744  
745  
746  
747  
748  
749  
750  
751  
752  
753  
754  
755  
756  
757  
758  
759

## References

- Abbott, R., Albach, D., Ansell, S., Arntzen, J.W., Baird, S.J.E., Bierne, N., Boughman, J., Brelsford, A., Buerkle, C.A., Buggs, R., Butlin, R.K., Dieckmann, U., Eroukhmanoff, F., Grill, A., Cahan, S.H., Hermansen, J.S., Hewitt, G., Hudson, A.G., Jiggins, C., Jones, J., Keller, B., Marczewski, T., Mallet, J., Martinez-Rodriguez, P., Möst, M., Mullen, S., Nichols, R., Nolte, A.W., Parisod, C., Pfennig, K., Rice, A.M., Ritchie, M.G., Seifert, B., Smadja, C.M., Stelkens, R., Szymura, J.M., Väinölä, R., Wolf, J.B.W., Zinner, D., 2013. Hybridization and speciation. *J. Evol. Biol.* 26, 229–246. <https://doi.org/10.1111/j.1420-9101.2012.02599.x>
- Abbott, R.J., Barton, N.H., Good, J.M., 2016. Genomics of hybridization and its evolutionary consequences. *Mol. Ecol.* 25, 2325–2332. <https://doi.org/10.1111/mec.13685>
- Brown, W.R.A., Liti, G., Rosa, C., James, S., Roberts, I., Robert, V., Jolly, N., Tang, W., Baumann, P., Green, C., Schlegel, K., Young, J., Hirsch, F., Leek, S., Thomas, G., Blomberg, A., Warringer, J., 2011. A Geographically Diverse Collection of *Schizosaccharomyces pombe* Isolates Shows Limited Phenotypic Variation but Extensive Karyotypic Diversity. *G3 GenesGenomesGenetics* 1, 615–626. <https://doi.org/10.1534/g3.111.001123>
- Corbett-Detig, R.B., Zhou, J., Clark, A.G., Hartl, D.L., Ayroles, J.F., 2013. Genetic incompatibilities are widespread within species. *Nature* 504, 135–137. <https://doi.org/10.1038/nature12678>
- Currall, B.B., Chiangmai, C., Talkowski, M.E., Morton, C.C., 2013. Mechanisms for Structural Variation in the Human Genome. *Curr. Genet. Med. Rep.* 1, 81–90. <https://doi.org/10.1007/s40142-013-0012-8>
- Dowling, T. E., Smith, G. R. & Brown, W. M. Reproductive isolation and introgression between *Notropis cornutus* and *Notropis chrysocephalus* (family Cyprinidae): comparison of morphology, allozymes, and mitochondrial DNA. *Evolution*. **43**, 620–634 (1989).
- Eroukhmanoff, F., Hermansen, J.S., Bailey, R.I., Sæther, S.A., Sætre, G.-P., 2013. Local adaptation within a hybrid species. *Heredity* 111, 286–292. <https://doi.org/10.1038/hdy.2013.47>
- Faria, R., Navarro, A., 2010. Chromosomal speciation revisited: rearranging theory with pieces of evidence. *Trends Ecol. Evol.* 25, 660–669. <https://doi.org/10.1016/j.tree.2010.07.008>
- Farlow, A., Long, H., Arnoux, S., Sung, W., Doak, T.G., Nordborg, M., Lynch, M., 2015. The Spontaneous Mutation Rate in the Fission Yeast *Schizosaccharomyces pombe*. *Genetics* 201, 737–744. <https://doi.org/10.1534/genetics.115.177329>
- Fawcett, J.A., Iida, T., Takuno, S., Sugino, R.P., Kado, T., Kugou, K., Mura, S., Kobayashi, T., Ohta, K., Nakayama, J., Innan, H., 2014. Population Genomics of the Fission Yeast *Schizosaccharomyces pombe*. *PLOS ONE* 9, e104241. <https://doi.org/10.1371/journal.pone.0104241>
- Fisher, R.A., 1999. *The genetical theory of natural selection: a complete variorum edition.* Oxford University Press.
- Fowler, K.R., Sasaki, M., Milman, N., Keeney, S., Smith, G.R., 2014. Evolutionarily diverse determinants of meiotic DNA break and recombination landscapes across the genome. *Genome Res.* 24, 1650–1664. <https://doi.org/10.1101/gr.172122.114>
- Hagan, I.M., Carr, A.M., Grallert, A., Nurse, P., 2016. *Fission yeast: a laboratory manual.* Cold Spring Harbor Laboratory Press.

- 760 Hill, W.G., Robertson, A., 1968. Linkage disequilibrium in finite populations. *Theor. Appl.*  
761 *Genet.* 38, 226–231. <https://doi.org/10.1007/BF01245622>
- 762 Hill, W.G., Weir, B.S., 1988. Variances and covariances of squared linkage disequilibria in  
763 finite populations. *Theor. Popul. Biol.* 33, 54–78. <https://doi.org/10.1016/0040->  
764 5809(88)90004-4
- 765 Hoffman, C.S., Wood, V., Fantes, P.A., 2015. An Ancient Yeast for Young Geneticists: A  
766 Primer on the *Schizosaccharomyces pombe* Model System. *Genetics* 201, 403–423.  
767 <https://doi.org/10.1534/genetics.115.181503>
- 768 Hoffmann, A.A., Rieseberg, L.H., 2008. Revisiting the Impact of Inversions in Evolution:  
769 From Population Genetic Markers to Drivers of Adaptive Shifts and Speciation? *Annu.*  
770 *Rev. Ecol. Evol. Syst.* 39, 21–42.  
771 <https://doi.org/10.1146/annurev.ecolsys.39.110707.173532>
- 772 Hu, W., Jiang, Z.-D., Suo, F., Zheng, J.-X., He, W.-Z., Du, L.-L., 2017. A large gene family  
773 in fission yeast encodes spore killers that subvert Mendel’s law. *eLife* 6.  
774 <https://doi.org/10.7554/eLife.26057>
- 775 Janzen, T., Nolte, A. W. & Traulsen, A. The breakdown of genomic ancestry blocks in hybrid  
776 lineages given a finite number of recombination sites: breakdown of ancestry blocks  
777 after hybridization. *Evolution.* **72**, 735–750 (2018).
- 778 Jay, P., Whibley, A., Frézal, L., Rodríguez de Cara, M.Á., Nowell, R.W., Mallet, J.,  
779 Dasmahapatra, K.K., Joron, M., 2018. Supergene Evolution Triggered by the  
780 Introgression of a Chromosomal Inversion. *Curr. Biol.* 28, 1839–1845.e3.  
781 <https://doi.org/10.1016/j.cub.2018.04.072>
- 782 Jeffares, D.C., 2018. The natural diversity and ecology of fission yeast. *Yeast* 35, 253–260.  
783 <https://doi.org/10.1002/yea.3293>
- 784 Jeffares, D.C., Jolly, C., Hoti, M., Speed, D., Shaw, L., Rallis, C., Balloux, F., Dessimoz, C.,  
785 Bähler, J., Sedlazeck, F.J., 2017. Transient structural variations have strong effects on  
786 quantitative traits and reproductive isolation in fission yeast. *Nat. Commun.* 8, 14061.  
787 <https://doi.org/10.1038/ncomms14061>
- 788 Jeffares, D.C., Rallis, C., Rieux, A., Speed, D., Převorovský, M., Mourier, T., Marsellach,  
789 F.X., Iqbal, Z., Lau, W., Cheng, T.M.K., Pracana, R., Mülleder, M., Lawson, J.L.D.,  
790 Chessel, A., Bala, S., Hellenthal, G., O’Fallon, B., Keane, T., Simpson, J.T., Bischof,  
791 L., Tomiczek, B., Bitton, D.A., Sideri, T., Codlin, S., Hellberg, J.E.E.U., van Trigt, L.,  
792 Jeffery, L., Li, J.-J., Atkinson, S., Thodberg, M., Febrer, M., McLay, K., Drou, N.,  
793 Brown, W., Hayles, J., Salas, R.E.C., Ralser, M., Maniatis, N., Balding, D.J., Balloux,  
794 F., Durbin, R., Bähler, J., 2015. The genomic and phenotypic diversity of  
795 *Schizosaccharomyces pombe*. *Nat. Genet.* 47, 235–241.  
796 <https://doi.org/10.1038/ng.3215>
- 797 Josse, J., Husson, F., 2016. missMDA: A Package for Handling Missing Values in  
798 Multivariate Data Analysis. *J. Stat. Softw.* 70. <https://doi.org/10.18637/jss.v070.i01>
- 799 Kelly, F.D., Levin, H.L., 2005. The evolution of transposons in *Schizosaccharomyces pombe*.  
800 *Cytogenet. Genome Res.* 110, 566–574. <https://doi.org/10.1159/000084990>
- 801 Khost, D. E., Eickbush, D. G. & Larracuenta, A. M. Single molecule long read sequencing  
802 resolves the detailed structure of complex satellite DNA loci in. (2016).
- 803 Kondrat’eva, V.I., Naumov, G.I., 2001. The Phenomenon of Spore Killing in  
804 *Schizosaccharomyces pombe* Hybrids. *Dokl. Biol. Sci.* 379, 385–388.  
805 <https://doi.org/10.1023/A:1011624918673>
- 806 Koren, S., Walenz, B.P., Berlin, K., Miller, J.R., Bergman, N.H., Phillippy, A.M., 2017.  
807 Canu: scalable and accurate long-read assembly via adaptive *k*-mer weighting and  
808 repeat separation. *Genome Res.* 27, 722–736. <https://doi.org/10.1101/gr.215087.116>

- 809 Küpper, C., Stocks, M., Risse, J.E., dos Remedios, N., Farrell, L.L., McRae, S.B., Morgan,  
810 T.C., Karlionova, N., Pinchuk, P., Verkuil, Y.I., Kitaysky, A.S., Wingfield, J.C.,  
811 Piersma, T., Zeng, K., Slate, J., Blaxter, M., Lank, D.B., Burke, T., 2016. A supergene  
812 determines highly divergent male reproductive morphs in the ruff. *Nat. Genet.* 48, 79–  
813 83.
- 814 Kurtz, S., Phillippy, A., Delcher, A.L., Smoot, M., Shumway, M., Antonescu, C., Salzberg,  
815 S.L., 2004. Versatile and open software for comparing large genomes. *Genome Biol.* 5,  
816 R12.
- 817 Lamichhaney, S. *et al.* Rapid hybrid speciation in Darwin’s finches. *Science* eaao4593 (2017).
- 818 Leducq, J.-B., Nielly-Thibault, L., Charron, G., Eberlein, C., Verta, J.-P., Samani, P.,  
819 Sylvester, K., Hittinger, C.T., Bell, G., Landry, C.R., 2016. Speciation driven by  
820 hybridization and chromosomal plasticity in a wild yeast. *Nat. Microbiol.* 1, 15003.  
821 <https://doi.org/10.1038/nmicrobiol.2015.3>
- 822 Mallet, J., 2007. Hybrid speciation. *Nature* 446, 279–283.  
823 <https://doi.org/10.1038/nature05706>
- 824 Mallet, J., 2005. Hybridization as an invasion of the genome. *Trends Ecol. Evol.* 20, 229–237.
- 825 Marsellach, X. A non-genetic meiotic repair program inferred from spore survival values in  
826 fission yeast wild isolates: a clue for an epigenetic ratchet-like model of ageing?  
827 (2017).
- 828 McDonald, M.J., Rice, D.P., Desai, M.M., 2016. Sex speeds adaptation by altering the  
829 dynamics of molecular evolution. *Nature* 531, 233–236.  
830 <https://doi.org/10.1038/nature17143>
- 831 Meier, J.I., Marques, D.A., Mwaiko, S., Wagner, C.E., Excoffier, L., Seehausen, O., 2017.  
832 Ancient hybridization fuels rapid cichlid fish adaptive radiations. *Nat. Commun.* 8,  
833 ncomms14363. <https://doi.org/10.1038/ncomms14363>
- 834 Muller, H.J., 1932. Some genetic aspects of sex. *Am. Nat.* 66, 118–138.
- 835 Munz, P., Wolf, K., Kohli, J., Leupold, U., 1989. Genetics overview. *Mol. Biol. Fission Yeast*  
836 1–30.
- 837 Naumov, G.I., Kondratieva, V.I., Naumova, E.S., 2015. Hybrid sterility of the yeast  
838 *Schizosaccharomyces pombe*: Genetic genus and many species in statu nascendi?  
839 *Microbiology* 84, 159–169. <https://doi.org/10.1134/S0026261715010099>
- 840 Nei, M., Li, W.H., 1979. Mathematical model for studying genetic variation in terms of  
841 restriction endonucleases. *Proc. Natl. Acad. Sci.* 76, 5269–5273.  
842 <https://doi.org/10.1073/pnas.76.10.5269>
- 843 Nieto Feliner, G., Álvarez, I., Fuertes-Aguilar, J., Heuertz, M., Marques, I., Moharrek, F.,  
844 Piñeiro, R., Riina, R., Rosselló, J.A., Soltis, P.S., Villa-Machío, I., 2017. Is homoploid  
845 hybrid speciation that rare? An empiricist’s view. *Heredity* 118, 513–516.  
846 <https://doi.org/10.1038/hdy.2017.7>
- 847 Nieuwenhuis, B.P.S., Tusso, S., Bjerling, P., Stångberg, J., Wolf, J.B.W., Immler, S., 2018.  
848 Repeated evolution of self-compatibility for reproductive assurance. *Nat. Commun.* 9.  
849 <https://doi.org/10.1038/s41467-018-04054-6>
- 850 Nolte, A.W., Sheets, H.D., 2005. Shape based assignment tests suggest transgressive  
851 phenotypes in natural sculpin hybrids (Teleostei, Scorpaeniformes, Cottidae). *Front.*  
852 *Zool.* 2, 11. <https://doi.org/10.1186/1742-9994-2-11>
- 853 Nuckolls, N.L., Bravo Núñez, M.A., Eickbush, M.T., Young, J.M., Lange, J.J., Yu, J.S.,  
854 Smith, G.R., Jaspersen, S.L., Malik, H.S., Zanders, S.E., 2017. wtf genes are prolific  
855 dual poison-antidote meiotic drivers. *eLife* 6. <https://doi.org/10.7554/eLife.26033>
- 856 Ortiz-Barrientos, D., Engelstädter, J., Rieseberg, L.H., 2016. Recombination Rate Evolution  
857 and the Origin of Species. *Trends Ecol. Evol.* 31, 226–236.  
858 <https://doi.org/10.1016/j.tree.2015.12.016>

- 859 Payseur, B. A. & Rieseberg, L. H. A genomic perspective on hybridization and speciation.  
860 *Mol. Ecol.* n/a-n/a (2016).
- 861 Pennisi, E., 2016. A shortcut to a species. *Science* 354, 818–818.  
862 <https://doi.org/10.1126/science.354.6314.818>
- 863 Peter, J., De Chiara, M., Friedrich, A., Yue, J.-X., Pflieger, D., Bergström, A., Sigwalt, A.,  
864 Barre, B., Freel, K., Llored, A., Cruaud, C., Labadie, K., Aury, J.-M., Istace, B.,  
865 Lebrigand, K., Barbry, P., Engelen, S., Lemainque, A., Wincker, P., Liti, G.,  
866 Schacherer, J., 2018. Genome evolution across 1,011 *Saccharomyces cerevisiae*  
867 isolates. *Nature* 556, 339–344. <https://doi.org/10.1038/s41586-018-0030-5>
- 868 Pfennig, K.S., Kelly, A.L., Pierce, A.A., 2016. Hybridization as a facilitator of species range  
869 expansion. *Proc. R. Soc. B Biol. Sci.* 283, 20161329.  
870 <https://doi.org/10.1098/rspb.2016.1329>
- 871 Poelstra, J.W., Vijay, N., Bossu, Christen, Lantz, Henrik, Ryll, Bettina, Müller, Inge,  
872 Baglione, Vittorio, Unneberg, Per, Wikelski, Martin, Grabherr, Manfred, Wolf, Jochen  
873 B. W., 2014. The genomic landscape underlying phenotypic integrity in the face of  
874 gene flow in crows. *Science* 344, 1410–1414.
- 875 Remington, D.L., Thornsberry, J.M., Matsuoka, Y., Wilson, L.M., Whitt, S.R., Doebley, J.,  
876 Kresovich, S., Goodman, M.M., Buckler, E.S., 2001. Structure of linkage  
877 disequilibrium and phenotypic associations in the maize genome. *Proc. Natl. Acad. Sci.*  
878 98, 11479–11484. <https://doi.org/10.1073/pnas.201394398>
- 879 Runemark, A. *et al.* Variation and constraints in hybrid genome formation. *Nat. Ecol. Evol.*  
880 (2018).
- 881 Sankararaman, S., Mallick, S., Dannemann, M., Prüfer, K., Kelso, J., Pääbo, S., Patterson, N.,  
882 Reich, D., 2014. The genomic landscape of Neanderthal ancestry in present-day  
883 humans. *Nature* 507, 354–357. <https://doi.org/10.1038/nature12961>
- 884 Schiffels, S., Durbin, R., 2014. Inferring human population size and separation history from  
885 multiple genome sequences. *Nat. Genet.* 46, 919–925. <https://doi.org/10.1038/ng.3015>
- 886 Schumer, M., Cui, R., Powell, D.L., Rosenthal, G.G., Andolfatto, P., 2016. Ancient  
887 hybridization and genomic stabilization in a swordtail fish. *Mol. Ecol.* 25, 2661–2679.  
888 <https://doi.org/10.1111/mec.13602>
- 889 Schumer, M., Rosenthal, G. G. & Andolfatto, P. How common is homoploid hybrid  
890 speciation?: Perspective. *Evolution* **68**, 1553–1560 (2014).
- 891 Sedlazeck, F.J., Rescheneder, P., Smolka, M., Fang, H., Nattestad, M., von Haeseler, A.,  
892 Schatz, M.C., 2018. Accurate detection of complex structural variations using single-  
893 molecule sequencing. *Nat. Methods* 15, 461–468. [https://doi.org/10.1038/s41592-018-](https://doi.org/10.1038/s41592-018-0001-7)  
894 [0001-7](https://doi.org/10.1038/s41592-018-0001-7)
- 895 Seehausen, O., 2004. Hybridization and adaptive radiation. *Trends Ecol. Evol.* 19, 198–207.  
896 <https://doi.org/10.1016/j.tree.2004.01.003>
- 897 Singh, G., Klar, A.J., 2002. The 2.1-kb inverted repeat DNA sequences flank the *mat2*, 3  
898 silent region in two species of *Schizosaccharomyces* and are involved in epigenetic  
899 silencing in *Schizosaccharomyces pombe*. *Genetics* 162, 591–602.
- 900 Soltis, P.S., Soltis, D.E., 2009. The Role of Hybridization in Plant Speciation. *Annu. Rev.*  
901 *Plant Biol.* 60, 561–588. <https://doi.org/10.1146/annurev.arplant.043008.092039>
- 902 Speed, D., Hemani, G., Johnson, M.R., Balding, D.J., 2012. Improved Heritability Estimation  
903 from Genome-wide SNPs. *Am. J. Hum. Genet.* 91, 1011–1021.  
904 <https://doi.org/10.1016/j.ajhg.2012.10.010>
- 905 Stamatakis, A., 2014. RAxML version 8: a tool for phylogenetic analysis and post-analysis of  
906 large phylogenies. *Bioinformatics* 30, 1312–1313.  
907 <https://doi.org/10.1093/bioinformatics/btu033>



- 908 Steenkamp, E.T., Wingfield, M.J., McTaggart, A.R., Wingfield, B.D., 2018. Fungal species  
909 and their boundaries matter – Definitions, mechanisms and practical implications.  
910 *Fungal Biol. Rev.* 32, 104–116. <https://doi.org/10.1016/j.fbr.2017.11.002>
- 911 Stukenbrock, E.H., 2016. The Role of Hybridization in the Evolution and Emergence of New  
912 Fungal Plant Pathogens. *Phytopathology* 106, 104–112.  
913 <https://doi.org/10.1094/PHYTO-08-15-0184-RVW>
- 914 Suzuki, R., Shimodaira, H., 2006. Pvcust: an R package for assessing the uncertainty in  
915 hierarchical clustering. *Bioinformatics* 22, 1540–1542.  
916 <https://doi.org/10.1093/bioinformatics/btl117>
- 917 Tajima, F., 1989. Statistical Method for Testing the Neutral Mutation Hypothesis by DNA  
918 Polymorphism. *Genetics* 123, 585–595.
- 919 Taylor, D.J., Hebert, P.D., 1993. Habitat-dependent hybrid parentage and differential  
920 introgression between neighboring sympatric *Daphnia* species. *Proc. Natl. Acad. Sci.*  
921 90, 7079–7083. <https://doi.org/10.1073/pnas.90.15.7079>
- 922 Team, R.C., 2014. R: A language and environment for statistical computing.
- 923 Teresa Avelar, A., Perfeito, L., Gordo, I., Godinho Ferreira, M., 2013. Genome architecture is  
924 a selectable trait that can be maintained by antagonistic pleiotropy. *Nat. Commun.* 4,  
925 2235. <https://doi.org/10.1038/ncomms3235>
- 926 The Heliconius Genome Consortium, Dasmahapatra, K.K., Walters, J.R., Briscoe, A.D.,  
927 Davey, J.W., Whibley, A., Nadeau, N.J., Zimin, A.V., Hughes, D.S.T., Ferguson, L.C.,  
928 Martin, S.H., Salazar, C., Lewis, J.J., Adler, S., Ahn, S.-J., Baker, D.A., Baxter, S.W.,  
929 Chamberlain, N.L., Chauhan, R., Counterman, B.A., Dalmay, T., Gilbert, L.E.,  
930 Gordon, K., Heckel, D.G., Hines, H.M., Hoff, K.J., Holland, P.W.H., Jacquin-Joly, E.,  
931 Jiggins, F.M., Jones, R.T., Kapan, D.D., Kersey, P., Lamas, G., Lawson, D., Mapleson,  
932 D., Maroja, L.S., Martin, A., Moxon, S., Palmer, W.J., Papa, R., Papanicolaou, A.,  
933 Pauchet, Y., Ray, D.A., Rosser, N., Salzberg, S.L., Supple, M.A., Surridge, A.,  
934 Tenger-Trolander, A., Vogel, H., Wilkinson, P.A., Wilson, D., Yorke, J.A., Yuan, F.,  
935 Balmuth, A.L., Eland, C., Gharbi, K., Thomson, M., Gibbs, R.A., Han, Y., Jayaseelan,  
936 J.C., Kovar, C., Mathew, T., Muzny, D.M., Ogeri, F., Pu, L.-L., Qu, J., Thornton,  
937 R.L., Worley, K.C., Wu, Y.-Q., Linares, M., Blaxter, M.L., French-Constant, R.H.,  
938 Joron, M., Kronforst, M.R., Mullen, S.P., Reed, R.D., Scherer, S.E., Richards, S.,  
939 Mallet, J., Owen McMillan, W., Jiggins, C.D., 2012. Butterfly genome reveals  
940 promiscuous exchange of mimicry adaptations among species. *Nature* 487, 94–98.  
941 <https://doi.org/10.1038/nature11041>
- 942 Turner, L.M., Harr, B., 2014. Genome-wide mapping in a house mouse hybrid zone reveals  
943 hybrid sterility loci and Dobzhansky-Muller interactions. *eLife* 3, e02504.  
944 <https://doi.org/10.7554/eLife.02504>
- 945 Twyford, A.D., Streisfeld, M.A., Lowry, D.B., Friedman, J., 2015. Genomic studies on the  
946 nature of species: adaptation and speciation in *Mimulus*. *Mol. Ecol.* 24, 2601–2609.  
947 <https://doi.org/10.1111/mec.13190>
- 948 Vijay, N., Bossu, C.M., Poelstra, J.W., Weissensteiner, M.H., Suh, A., Kryukov, A.P., Wolf,  
949 J.B.W., 2016. Evolution of heterogeneous genome differentiation across multiple  
950 contact zones in a crow species complex. *Nat. Commun.* 7, 13195.  
951 <https://doi.org/10.1038/ncomms13195>
- 952 Walker, B.J., Abeel, T., Shea, T., Priest, M., Abouelliel, A., Sakthikumar, S., Cuomo, C.A.,  
953 Zeng, Q., Wortman, J., Young, S.K., Earl, A.M., 2014. Pilon: An Integrated Tool for  
954 Comprehensive Microbial Variant Detection and Genome Assembly Improvement.  
955 *PLoS ONE* 9, e112963. <https://doi.org/10.1371/journal.pone.0112963>

- 956 Watterson, G.A., 1975. On the number of segregating sites in genetical models without  
957 recombination. *Theor. Popul. Biol.* 7, 256–276. [https://doi.org/10.1016/0040-](https://doi.org/10.1016/0040-5809(75)90020-9)  
958 [5809\(75\)90020-9](https://doi.org/10.1016/0040-5809(75)90020-9)
- 959 Weir, B.S., 1979. Inferences about Linkage Disequilibrium. *Biometrics* 35, 235.  
960 <https://doi.org/10.2307/2529947>
- 961 Wellenreuther, M., Bernatchez, L., 2018. Eco-Evolutionary Genomics of Chromosomal  
962 Inversions. *Trends Ecol. Evol.* 33, 427–440. <https://doi.org/10.1016/j.tree.2018.04.002>
- 963 Wood, V., Gwilliam, R., Rajandream, M.-A., Lyne, M., Lyne, R., Stewart, A., Sgouros, J.,  
964 Peat, N., Hayles, J., Baker, S., Basham, D., Bowman, S., Brooks, K., Brown, D.,  
965 Brown, S., Chillingworth, T., Churcher, C., Collins, M., Connor, R., Cronin, A., Davis,  
966 P., Feltwell, T., Fraser, A., Gentles, S., Goble, A., Hamlin, N., Harris, D., Hidalgo, J.,  
967 Hodgson, G., Holroyd, S., Hornsby, T., Howarth, S., Huckle, E.J., Hunt, S., Jagels, K.,  
968 James, K., Jones, L., Jones, M., Leather, S., McDonald, S., McLean, J., Mooney, P.,  
969 Moule, S., Mungall, K., Murphy, L., Niblett, D., Odell, C., Oliver, K., O’Neil, S.,  
970 Pearson, D., Quail, M.A., Rabbinowitsch, E., Rutherford, K., Rutter, S., Saunders, D.,  
971 Seeger, K., Sharp, S., Skelton, J., Simmonds, M., Squares, R., Squares, S., Stevens, K.,  
972 Taylor, K., Taylor, R.G., Tivey, A., Walsh, S., Warren, T., Whitehead, S., Woodward,  
973 J., Volckaert, G., Aert, R., Robben, J., Grymonprez, B., Weltjens, I., Vanstreels, E.,  
974 Rieger, M., Schäfer, M., Müller-Auer, S., Gabel, C., Fuchs, M., Düsterhöft, A., Fritzc,  
975 C., Holzer, E., Moestl, D., Hilbert, H., Borzym, K., Langer, I., Beck, A., Lehrach, H.,  
976 Reinhardt, R., Pohl, T.M., Eger, P., Zimmermann, W., Wedler, H., Wambutt, R.,  
977 Purnelle, B., Goffeau, A., Cadieu, E., Dréano, S., Gloux, S., Lelaure, V., Mottier, S.,  
978 Galibert, F., Aves, S.J., Xiang, Z., Hunt, C., Moore, K., Hurst, S.M., Lucas, M.,  
979 Rochet, M., Gaillardin, C., Tallada, V.A., Garzon, A., Thode, G., Daga, R.R., Cruzado,  
980 L., Jimenez, J., Sánchez, M., del Rey, F., Benito, J., Domínguez, A., Revuelta, J.L.,  
981 Moreno, S., Armstrong, J., Forsburg, S.L., Cerutti, L., Lowe, T., McCombie, W.R.,  
982 Paulsen, I., Potashkin, J., Shpakovski, G.V., Ussery, D., Barrell, B.G., Nurse, P., 2003.  
983 Erratum: corrigendum: The genome sequence of *Schizosaccharomyces pombe*. *Nature*  
984 421, 94–94. <https://doi.org/10.1038/nature01203>
- 985 Wood, V., Gwilliam, R., Rajandream, M.-A., Lyne, M., Lyne, R., Stewart, A., Sgouros, J.,  
986 Peat, N., Hayles, J., Baker, S., Basham, D., Bowman, S., Brooks, K., Brown, D.,  
987 Brown, S., Chillingworth, T., Churcher, C., Collins, M., Connor, R., Cronin, A., Davis,  
988 P., Feltwell, T., Fraser, A., Gentles, S., Goble, A., Hamlin, N., Harris, D., Hidalgo, J.,  
989 Hodgson, G., Holroyd, S., Hornsby, T., Howarth, S., Huckle, E.J., Hunt, S., Jagels, K.,  
990 James, K., Jones, L., Jones, M., Leather, S., McDonald, S., McLean, J., Mooney, P.,  
991 Moule, S., Mungall, K., Murphy, L., Niblett, D., Odell, C., Oliver, K., O’Neil, S.,  
992 Pearson, D., Quail, M.A., Rabbinowitsch, E., Rutherford, K., Rutter, S., Saunders, D.,  
993 Seeger, K., Sharp, S., Skelton, J., Simmonds, M., Squares, R., Squares, S., Stevens, K.,  
994 Taylor, K., Taylor, R.G., Tivey, A., Walsh, S., Warren, T., Whitehead, S., Woodward,  
995 J., Volckaert, G., Aert, R., Robben, J., Grymonprez, B., Weltjens, I., Vanstreels, E.,  
996 Rieger, M., Schäfer, M., Müller-Auer, S., Gabel, C., Fuchs, M., Fritzc, C., Holzer, E.,  
997 Moestl, D., Hilbert, H., Borzym, K., Langer, I., Beck, A., Lehrach, H., Reinhardt, R.,  
998 Pohl, T.M., Eger, P., Zimmermann, W., Wedler, H., Wambutt, R., Purnelle, B.,  
999 Goffeau, A., Cadieu, E., Dréano, S., Gloux, S., Lelaure, V., Mottier, S., Galibert, F.,  
1000 Aves, S.J., Xiang, Z., Hunt, C., Moore, K., Hurst, S.M., Lucas, M., Rochet, M.,  
1001 Gaillardin, C., Tallada, V.A., Garzon, A., Thode, G., Daga, R.R., Cruzado, L.,  
1002 Jimenez, J., Sánchez, M., del Rey, F., Benito, J., Domínguez, A., Revuelta, J.L.,  
1003 Moreno, S., Armstrong, J., Forsburg, S.L., Cerrutti, L., Lowe, T., McCombie, W.R.,  
1004 Paulsen, I., Potashkin, J., Shpakovski, G.V., Ussery, D., Barrell, B.G., Nurse, P., 2002.

- 1005 Erratum: The genome sequence of *Schizosaccharomyces pombe*. *Nature* 415, 871–880.  
1006 <https://doi.org/10.1038/nature724>  
1007 Zanders, S.E., Eickbush, M.T., Yu, J.S., Kang, J.-W., Fowler, K.R., Smith, G.R., Malik, H.S.,  
1008 2014. Genome rearrangements and pervasive meiotic drive cause hybrid infertility in  
1009 fission yeast. *eLife* 3, e02630. <https://doi.org/10.7554/eLife.02630>  
1010 Zheng, X., Gogarten, S.M., Lawrence, M., Stilp, A., Conomos, M.P., Weir, B.S., Laurie, C.,  
1011 Levine, D., 2017. SeqArray—a storage-efficient high-performance data format for  
1012 WGS variant calls. *Bioinformatics* 33, 2251–2257.  
1013 <https://doi.org/10.1093/bioinformatics/btx145>  
1014 Zheng, X., Levine, D., Shen, J., Gogarten, S.M., Laurie, C., Weir, B.S., 2012. A high-  
1015 performance computing toolset for relatedness and principal component analysis of  
1016 SNP data. *Bioinformatics* 28, 3326–3328.  
1017 <https://doi.org/10.1093/bioinformatics/bts606>  
1018  
1019  
1020

## 1021 **Figure legends**

1022

1023 **Figure 1 | Distribution of *Sp* (red) and *Sk* (blue) ancestry blocks along the *S. pombe***  
1024 **genome.** (a) Example of principal component analysis (PCA) of a representative genomic  
1025 window in chromosome I (top) and the whole mitochondrial DNA (bottom). Samples fall into  
1026 two major clades, *Sp* (red square) and *Sk* (blue square). The proportion of variance explained  
1027 by PC1 and PC2 is indicated on the axis labels. Additional examples are found in  
1028 Supplementary Figure 1 (b) Proportion of variance explained by PC1 (black line) and PC2  
1029 (grey line) for each genomic window along the genome. Centromeres are indicated with red  
1030 bars. Note the drop in proximity to centromeres and telomeres where genotype quality is  
1031 significantly reduced. (c) Heatmap for one representative of 57 near-clonal groups indicating  
1032 ancestry along the genome (right panel). Samples are organised according to a hierarchical  
1033 clustering, grouping samples based on ancestral block distribution (left dendrogram). Colours  
1034 on the tips of the cladogram represent cluster membership by chromosome (see  
1035 **Supplementary Figure 7**). Samples changing clustering group between chromosomes are  
1036 shown in grey. (d) Estimate of  $D_{xy}$  between ancestral groups and genetic diversity ( $\pi$ ) within  
1037 the *Sp* (red) and *Sk* clade (blue) along the genome.

1038

1039 **Figure 2 | Population genetic summary statistics.** (a) Proportion of *Sp* (red) and *Sk* (blue)  
1040 ancestry across all 57 samples along the genome. (b) Tajima's *D* differentiated by *Sp* (red)  
1041 and *Sk* (blue) ancestry and pooled across all samples irrespective of ancestry (grey line).  
1042 Genomic regions previously identified under purifying selection (Fawcett et al., 2014) are  
1043 shown with black triangles. Reported active meiotic drives (Zanders et al., 2014; Hu et al.,  
1044 2017; Nuckolls et al., 2017) are indicated by yellow triangles. The third panel shows the  
1045 difference between ancestry specific Tajima's *D* and the estimate from the pooled samples.

1046

1047 **Figure 3 | Inferred evolutionary history of contemporary *S. pombe* strains.** An ancestral  
1048 population diverged into two major clades, *Sp* (red) and *Sk* (blue) since approximately 2300  
1049 years ago (Jeffares et al., 2015). Recurrent hybridization upon secondary contact initiated  
1050 around 20 sexual outcrossing generations ago resulted in admixed genomes with a range of  
1051 admixture proportions (bottom) prevailing today.

1052

1053 **Figure 4 | Ancestry explains variation in phenotype and reproductive isolation.** (a) PCA  
1054 of normalized phenotypic variation across 228 traits. The proportion of variance explained by  
1055 PC1 and PC2 is indicated on the axis labels. Admixed samples (dots) are coloured coded by  
1056 ancestry proportion (cf. **Figure 3**) ranging from pure *Sp* (red triangle) to pure *Sk* (blue  
1057 triangle) ancestry. (b) Phenotypic distribution of example traits separated by the degree of  
1058 admixture: admixed samples are shown in grey, pure ancestral *Sp* and *Sk* samples are shown  
1059 in red and blue respectively. The number of traits corresponding to a dominant, additive and  
1060 transgressive genetic architecture is indicated on the right hand side (c) Comparison of  
1061 heritability estimates of all 228 traits based on 172,935 SNPs (abscissa) and on 1925 genomic  
1062 windows polarized by ancestry (ordinate). Colours indicate statistical significance. *NS*:  
1063 heritability values not significantly different from zero, *AncHap*: significant only using

1064 ancestral blocks, *SNPs*: significant only using SNPs, *SB*: significant in both analyses.  
1065 Diagonal (slope=1) added as reference. (d) Histogram of the difference between heritability  
1066 estimates using SNPs and ancestry components for all 228 traits. (e) Correlation between the  
1067 difference in ancestry proportions between two strains (cf. **Figure 2**) and spore viability of the  
1068 cross. Red box shows samples with low spore viability but high genetic similarity.

1069

1070 **Figure 5 | Characterization of structural variation based on long-read, real-time**  
1071 **sequencing.** (a) Schematic representation of the three chromosomes in different strains  
1072 displaying SVs larger than 10kb relative to reference genome JB22 (left panel). Chromosome  
1073 arms are differentiated by colour; orientation is indicated with arrows relative to the reference;  
1074 black bars represent centromeres. In the second panel, additional SVs, their type and ID of the  
1075 corresponding strain are illustrated in brackets. (b) Size distribution of SVs below 10 kb.  
1076 Colours indicate the type of SV. (c) Distribution of SV density along the genome. Black bars  
1077 represent centromeres. (d) Two-dimensional, folded site frequency spectrum between inferred  
1078 ancestral populations for all SVs, SNPs and LTR INDELS. Numbers and colours show the  
1079 percentage of the total number of variants in each category. Variants with low frequency in  
1080 both populations are shown in the blue box. Variants highly differentiated between  
1081 populations are show in red boxes with total in the upper right box. Fills with percentage  
1082 lower than 0.01 are empty.

1083 *Abbreviations:* DEL: deletion; DUP: duplication; INS: insertion; INV: inversion

1084

1085 **Figure 6 | Decay in linkage disequilibrium (LD) with genetic distance.** Relationship  
1086 between LD ( $R^2$ ) and physical distance is depicted for each chromosome. Black points  
1087 represent values for each window pair comparison. Lines show non-linear regression model  
1088 based on Hill & Weir (1988) and Remington et al. (2001). LD estimates were divided into

1089 three categories representing comparison between windows of shared ancestry ( $Sp-Sp$  or  $Sk-$   
1090  $Sk$ ) reflecting positive ancestry disequilibrium (AD) or of opposite ancestry ( $Sk-Sp$ ) reflecting  
1091 negative AD.

1092

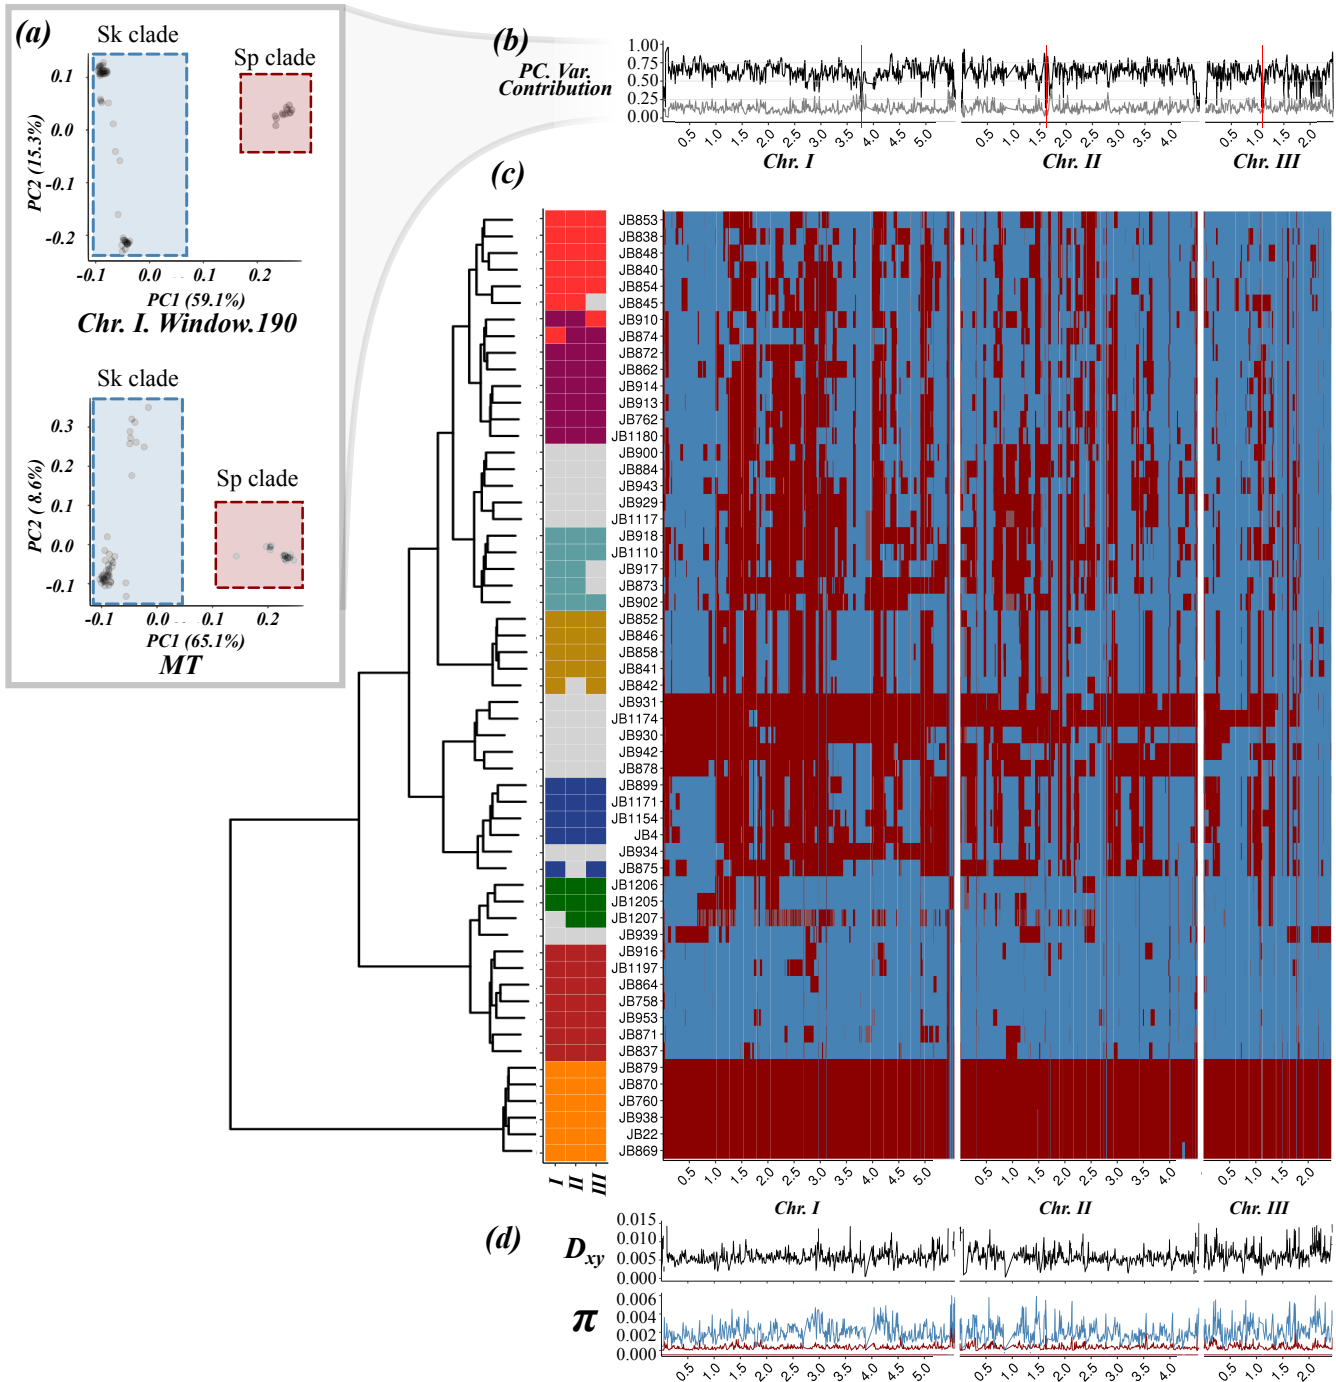

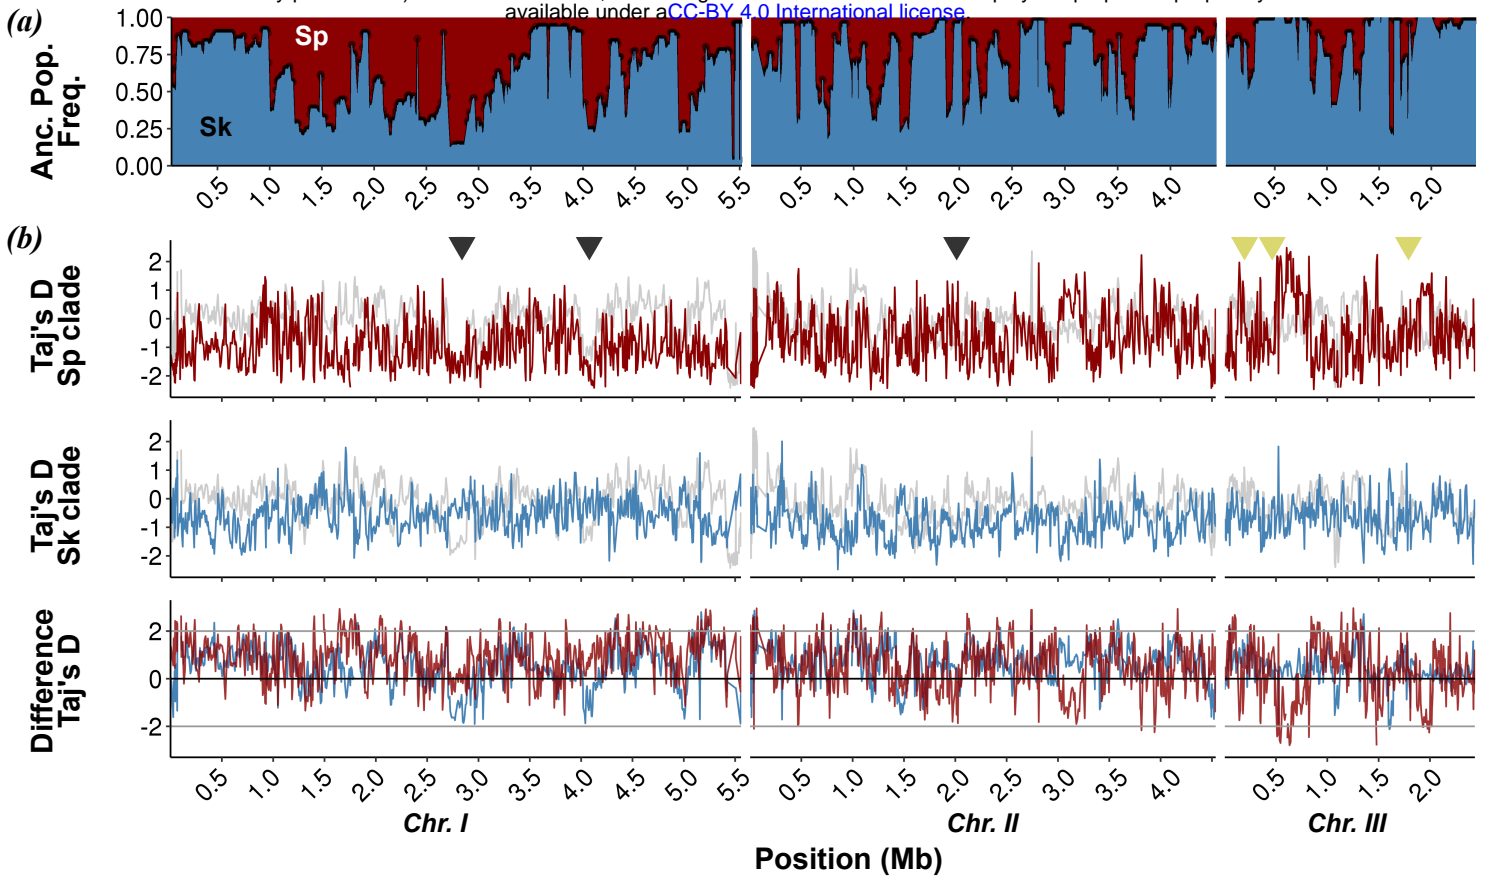



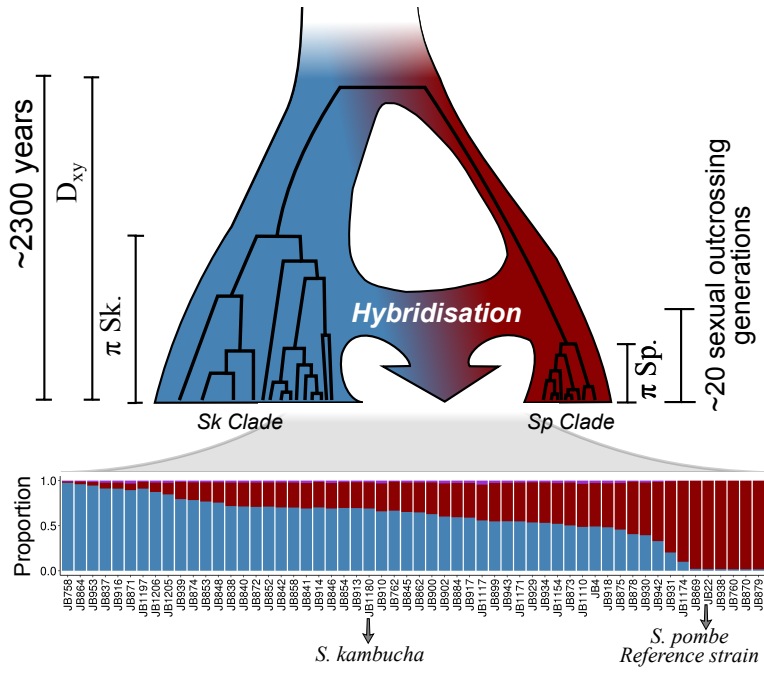

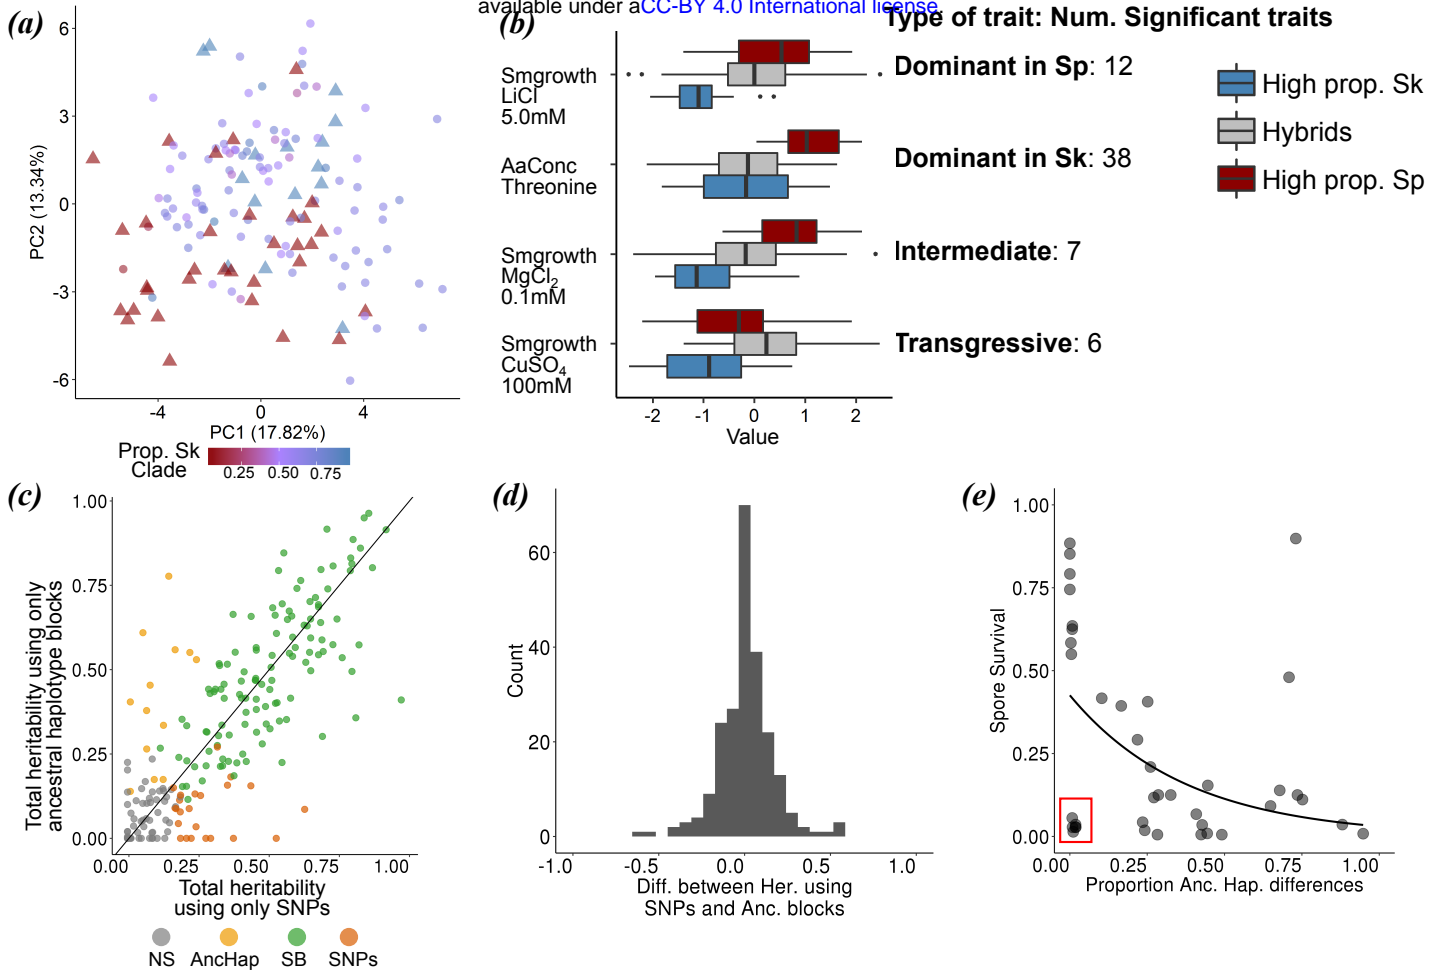



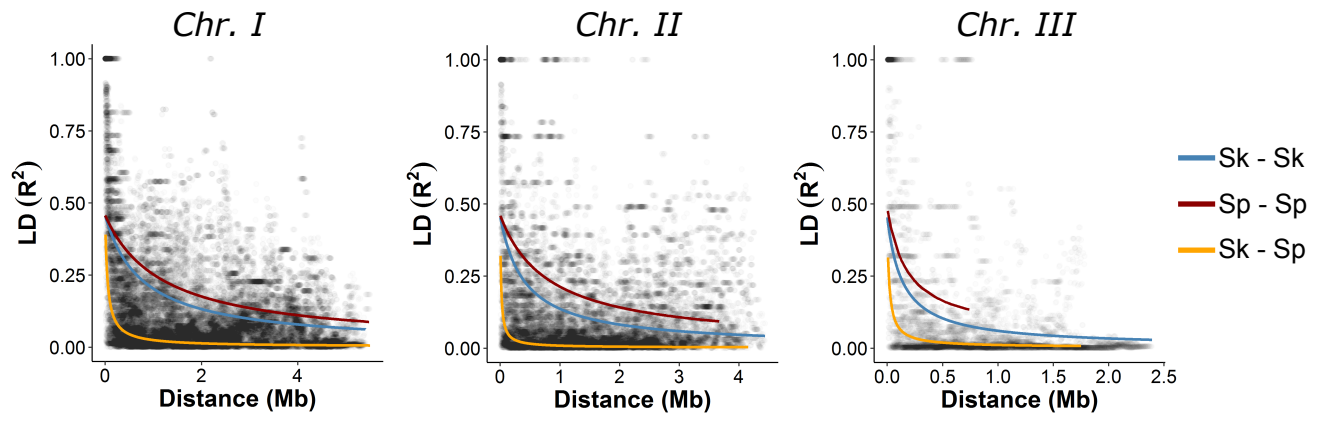

Source: https://www.biorxiv.org/content/10.1101/415091v2.full.pdf
